# Supplementary material for: High fat diet induces microbiota-dependent silencing of enteroendocrine cells
Source: eLife. 2019 Dec 3;8:e48479. doi: 10.7554/eLife.48479 (PMC6937151; doi:10.7554/eLife.48479)
Supplement: Supplementary file 1. [file elife-48479-supp1.xlsx]

## Sheet: primers for real-time PCR
Target gene		Primer sequence
vip2	F	GGCCAGCTGTCTGCTAAAGA
	R	CGTGCATCACCTCCGTTTTC
pyyb	F	AGCGTATCCACCCAAACCTG
	R	GCCGGATGTCCTGTTCATCA
ghrl	F	ATGGTCCCGTGCTTCAGAAT
	R	ATGCACCCACTTTGCTACAGA
insl5a	F	TGCTGTAAGCAGACGAGACC
	R	AGCAGAGGAACGTCAGGTCA
sst2	F	GAACTCTGCACTACAGGCGT
	R	CTCCAGTCCACTGTGTAGCG
gcga	F	GTCATGCAGAGGGCACCTAC
	R	ATGTTTGGCAGGAGAAAGCG
ccka	F	AACCAAAGGCTCATACCGCA
	R	TCATATTCCTCGGCGCTTCG
neurod1	F	ACCACGAAGGGCATGAAACT
	R	GTCCACGTCTCGTTCGTCTT
pax6b	F	CCACACCGTACGGGATTCAA
	R	GTTTTCCCAGCGTCCCTCTT
isl1	F	CTGGTCGGCTACACTTTTGC
	R	TTGCATGCTTAGTACTTGGGC
grp94	F	TCCCGCACCGATGACGA
	R	GTAGAAGCCCACACCGAACTGAC
bip	F	AAGAGGCCGAAGAGAAGGAC
	R	AGCAGCAGAGCCTCGAAATA
atf4	F	TTAGCGATTGCTCCGATAGC
	R	GCTGCGGTTTTATTCTGCTC
atf6	F	CTGTGGTGAAACCTCCACCT
	R	CATGGTGACCACAGGAGATG
xbp1-t	F	GAGGAGCCCACAAAGTCCTC
	R	CGAAGTGCTTTTTCCTCTGG
xbp1-s	F	TGTTGCGAGACAAGACGA
	R	CCTGCACCTGCTGCGGACT
18s	F	TTACCCCAGGCTCGGAAAAC
	R	CGGGAAGGTCTTTGAACCCA
