# Supplementary material for: High fat diet induces microbiota-dependent silencing of enteroendocrine cells
Source: eLife. 2019 Dec 3;8:e48479. doi: 10.7554/eLife.48479 (PMC6937151; doi:10.7554/eLife.48479)
Supplement: Supplementary file 2. [file elife-48479-supp2.xlsx]

## Sheet: level-17 (ASVs)
Sample name	D_0__Archaea;D_1__Euryarchaeota;D_2__Halobacteria;D_3__Halobacteriales;D_4__Halobacteriaceae;D_5__Halarchaeum;D_6__uncultured archaeon;D_7__;D_8__;D_9__;D_10__;D_11__;D_12__;D_13__;D_14__;D_15__;D_16__	D_0__Archaea;D_1__Euryarchaeota;D_2__Methanobacteria;D_3__Methanobacteriales;D_4__Methanobacteriaceae;D_5__Methanothermobacter;D_6__uncultured archaeon;D_7__;D_8__;D_9__;D_10__;D_11__;D_12__;D_13__;D_14__;D_15__;D_16__	D_0__Bacteria;D_1__Acidobacteria;D_2__Acidobacteria;D_3__Acidobacteriales;D_4__Acidobacteriaceae (Subgroup 1);D_5__Terriglobus;D_6__uncultured bacterium;D_7__;D_8__;D_9__;D_10__;D_11__;D_12__;D_13__;D_14__;D_15__;D_16__	D_0__Bacteria;D_1__Actinobacteria;D_2__Acidimicrobiia;D_3__Acidimicrobiales;D_4__Iamiaceae;D_5__Iamia;D_6__uncultured bacterium;D_7__;D_8__;D_9__;D_10__;D_11__;D_12__;D_13__;D_14__;D_15__;D_16__	D_0__Bacteria;D_1__Actinobacteria;D_2__Acidimicrobiia;D_3__Acidimicrobiales;D_4__uncultured;D_5__uncultured bacterium;D_6__;D_7__;D_8__;D_9__;D_10__;D_11__;D_12__;D_13__;D_14__;D_15__;D_16__	D_0__Bacteria;D_1__Actinobacteria;D_2__Actinobacteria;D_3__Actinomycetales;D_4__Actinomycetaceae;D_5__Actinomyces;D_6__uncultured bacterium;D_7__;D_8__;D_9__;D_10__;D_11__;D_12__;D_13__;D_14__;D_15__;D_16__	D_0__Bacteria;D_1__Actinobacteria;D_2__Actinobacteria;D_3__Actinomycetales;D_4__Actinomycetaceae;D_5__Actinomyces;D_6__uncultured organism;D_7__;D_8__;D_9__;D_10__;D_11__;D_12__;D_13__;D_14__;D_15__;D_16__	D_0__Bacteria;D_1__Actinobacteria;D_2__Actinobacteria;D_3__Bifidobacteriales;D_4__Bifidobacteriaceae;D_5__Bifidobacterium;D_6__uncultured bacterium;D_7__;D_8__;D_9__;D_10__;D_11__;D_12__;D_13__;D_14__;D_15__;D_16__	D_0__Bacteria;D_1__Actinobacteria;D_2__Actinobacteria;D_3__Corynebacteriales;D_4__Corynebacteriaceae;D_5__Corynebacterium;D_6__uncultured bacterium;D_7__;D_8__;D_9__;D_10__;D_11__;D_12__;D_13__;D_14__;D_15__;D_16__	D_0__Bacteria;D_1__Actinobacteria;D_2__Actinobacteria;D_3__Corynebacteriales;D_4__Corynebacteriaceae;D_5__Corynebacterium;__;__;__;__;__;__;__;__;__;__;__	D_0__Bacteria;D_1__Actinobacteria;D_2__Actinobacteria;D_3__Corynebacteriales;D_4__Corynebacteriaceae;D_5__uncultured;D_6__uncultured bacterium;D_7__;D_8__;D_9__;D_10__;D_11__;D_12__;D_13__;D_14__;D_15__;D_16__	D_0__Bacteria;D_1__Actinobacteria;D_2__Actinobacteria;D_3__Corynebacteriales;D_4__Mycobacteriaceae;D_5__Mycobacterium;__;__;__;__;__;__;__;__;__;__;__	D_0__Bacteria;D_1__Actinobacteria;D_2__Actinobacteria;D_3__Micrococcales;D_4__Bogoriellaceae;D_5__Georgenia;D_6__uncultured bacterium;D_7__;D_8__;D_9__;D_10__;D_11__;D_12__;D_13__;D_14__;D_15__;D_16__	D_0__Bacteria;D_1__Actinobacteria;D_2__Actinobacteria;D_3__Micrococcales;D_4__Intrasporangiaceae;__;__;__;__;__;__;__;__;__;__;__;__	D_0__Bacteria;D_1__Actinobacteria;D_2__Actinobacteria;D_3__Micrococcales;D_4__Microbacteriaceae;D_5__Agromyces;D_6__uncultured bacterium;D_7__;D_8__;D_9__;D_10__;D_11__;D_12__;D_13__;D_14__;D_15__;D_16__	D_0__Bacteria;D_1__Actinobacteria;D_2__Actinobacteria;D_3__Micrococcales;D_4__Microbacteriaceae;D_5__Leucobacter;D_6__uncultured bacterium;D_7__;D_8__;D_9__;D_10__;D_11__;D_12__;D_13__;D_14__;D_15__;D_16__	D_0__Bacteria;D_1__Actinobacteria;D_2__Actinobacteria;D_3__Micrococcales;D_4__Microbacteriaceae;D_5__Lysinimonas;D_6__uncultured bacterium;D_7__;D_8__;D_9__;D_10__;D_11__;D_12__;D_13__;D_14__;D_15__;D_16__	D_0__Bacteria;D_1__Actinobacteria;D_2__Actinobacteria;D_3__Micrococcales;D_4__Micrococcaceae;D_5__Arthrobacter;__;__;__;__;__;__;__;__;__;__;__	D_0__Bacteria;D_1__Actinobacteria;D_2__Actinobacteria;D_3__Micrococcales;D_4__Micrococcaceae;D_5__Kocuria;D_6__uncultured bacterium;D_7__;D_8__;D_9__;D_10__;D_11__;D_12__;D_13__;D_14__;D_15__;D_16__	D_0__Bacteria;D_1__Actinobacteria;D_2__Actinobacteria;D_3__Micrococcales;D_4__Micrococcaceae;D_5__Micrococcus;D_6__Micrococcus luteus;D_7__;D_8__;D_9__;D_10__;D_11__;D_12__;D_13__;D_14__;D_15__;D_16__	D_0__Bacteria;D_1__Actinobacteria;D_2__Actinobacteria;D_3__Micrococcales;D_4__Micrococcaceae;D_5__Micrococcus;__;__;__;__;__;__;__;__;__;__;__	D_0__Bacteria;D_1__Actinobacteria;D_2__Actinobacteria;D_3__Propionibacteriales;D_4__Nocardioidaceae;D_5__Nocardioides;D_6__uncultured bacterium;D_7__;D_8__;D_9__;D_10__;D_11__;D_12__;D_13__;D_14__;D_15__;D_16__	D_0__Bacteria;D_1__Actinobacteria;D_2__Actinobacteria;D_3__Propionibacteriales;D_4__Propionibacteriaceae;D_5__Propionibacterium;D_6__uncultured bacterium;D_7__;D_8__;D_9__;D_10__;D_11__;D_12__;D_13__;D_14__;D_15__;D_16__	D_0__Bacteria;D_1__Actinobacteria;D_2__Actinobacteria;D_3__Pseudonocardiales;D_4__Pseudonocardiaceae;D_5__Pseudonocardia;D_6__uncultured bacterium;D_7__;D_8__;D_9__;D_10__;D_11__;D_12__;D_13__;D_14__;D_15__;D_16__	D_0__Bacteria;D_1__Actinobacteria;D_2__Actinobacteria;D_3__Pseudonocardiales;D_4__Pseudonocardiaceae;D_5__Saccharopolyspora;D_6__uncultured bacterium;D_7__;D_8__;D_9__;D_10__;D_11__;D_12__;D_13__;D_14__;D_15__;D_16__	D_0__Bacteria;D_1__Armatimonadetes;D_2__uncultured bacterium;D_3__;D_4__;D_5__;D_6__;D_7__;D_8__;D_9__;D_10__;D_11__;D_12__;D_13__;D_14__;D_15__;D_16__	D_0__Bacteria;D_1__BD1-5;D_2__uncultured soil bacterium;D_3__;D_4__;D_5__;D_6__;D_7__;D_8__;D_9__;D_10__;D_11__;D_12__;D_13__;D_14__;D_15__;D_16__	D_0__Bacteria;D_1__Bacteroidetes;D_2__Bacteroidia;D_3__Bacteroidales;D_4__Bacteroidaceae;D_5__Bacteroides;D_6__uncultured organism;D_7__;D_8__;D_9__;D_10__;D_11__;D_12__;D_13__;D_14__;D_15__;D_16__	D_0__Bacteria;D_1__Bacteroidetes;D_2__Bacteroidia;D_3__Bacteroidales;D_4__Bacteroidaceae;D_5__Bacteroides;__;__;__;__;__;__;__;__;__;__;__	D_0__Bacteria;D_1__Bacteroidetes;D_2__Bacteroidia;D_3__Bacteroidales;D_4__Porphyromonadaceae;D_5__Proteiniphilum;D_6__uncultured bacterium;D_7__;D_8__;D_9__;D_10__;D_11__;D_12__;D_13__;D_14__;D_15__;D_16__	D_0__Bacteria;D_1__Bacteroidetes;D_2__Bacteroidia;D_3__Bacteroidales;D_4__Porphyromonadaceae;D_5__uncultured;D_6__uncultured bacterium;D_7__;D_8__;D_9__;D_10__;D_11__;D_12__;D_13__;D_14__;D_15__;D_16__	D_0__Bacteria;D_1__Bacteroidetes;D_2__Bacteroidia;D_3__Bacteroidales;D_4__Prevotellaceae;D_5__Alloprevotella;D_6__uncultured bacterium;D_7__;D_8__;D_9__;D_10__;D_11__;D_12__;D_13__;D_14__;D_15__;D_16__	D_0__Bacteria;D_1__Bacteroidetes;D_2__Bacteroidia;D_3__Bacteroidales;D_4__S24-7;D_5__uncultured bacterium;D_6__;D_7__;D_8__;D_9__;D_10__;D_11__;D_12__;D_13__;D_14__;D_15__;D_16__	D_0__Bacteria;D_1__Bacteroidetes;D_2__Cytophagia;D_3__Cytophagales;D_4__Cytophagaceae;D_5__Dyadobacter;D_6__uncultured bacterium;D_7__;D_8__;D_9__;D_10__;D_11__;D_12__;D_13__;D_14__;D_15__;D_16__	D_0__Bacteria;D_1__Bacteroidetes;D_2__Cytophagia;D_3__Cytophagales;D_4__Cytophagaceae;D_5__Emticicia;D_6__uncultured bacterium;D_7__;D_8__;D_9__;D_10__;D_11__;D_12__;D_13__;D_14__;D_15__;D_16__	D_0__Bacteria;D_1__Bacteroidetes;D_2__Cytophagia;D_3__Cytophagales;D_4__Cytophagaceae;D_5__Flectobacillus;D_6__uncultured bacterium;D_7__;D_8__;D_9__;D_10__;D_11__;D_12__;D_13__;D_14__;D_15__;D_16__	D_0__Bacteria;D_1__Bacteroidetes;D_2__Cytophagia;D_3__Cytophagales;D_4__Cytophagaceae;D_5__Flexibacter;D_6__uncultured Flexibacteraceae bacterium;D_7__;D_8__;D_9__;D_10__;D_11__;D_12__;D_13__;D_14__;D_15__;D_16__	D_0__Bacteria;D_1__Bacteroidetes;D_2__Cytophagia;D_3__Cytophagales;D_4__Cytophagaceae;D_5__Runella;D_6__uncultured bacterium;D_7__;D_8__;D_9__;D_10__;D_11__;D_12__;D_13__;D_14__;D_15__;D_16__	D_0__Bacteria;D_1__Bacteroidetes;D_2__Cytophagia;D_3__Cytophagales;D_4__Cytophagaceae;D_5__Spirosoma;D_6__uncultured bacterium;D_7__;D_8__;D_9__;D_10__;D_11__;D_12__;D_13__;D_14__;D_15__;D_16__	D_0__Bacteria;D_1__Bacteroidetes;D_2__Cytophagia;D_3__Cytophagales;D_4__Cytophagaceae;D_5__uncultured Bacteroidetes bacterium;D_6__;D_7__;D_8__;D_9__;D_10__;D_11__;D_12__;D_13__;D_14__;D_15__;D_16__	D_0__Bacteria;D_1__Bacteroidetes;D_2__Cytophagia;D_3__Cytophagales;D_4__Cytophagaceae;D_5__uncultured;D_6__uncultured Bacteroidetes bacterium;D_7__;D_8__;D_9__;D_10__;D_11__;D_12__;D_13__;D_14__;D_15__;D_16__	D_0__Bacteria;D_1__Bacteroidetes;D_2__Cytophagia;D_3__Cytophagales;D_4__Cytophagaceae;D_5__uncultured;D_6__uncultured bacterium;D_7__;D_8__;D_9__;D_10__;D_11__;D_12__;D_13__;D_14__;D_15__;D_16__	D_0__Bacteria;D_1__Bacteroidetes;D_2__Cytophagia;D_3__Cytophagales;D_4__Cytophagaceae;D_5__uncultured;__;__;__;__;__;__;__;__;__;__;__	D_0__Bacteria;D_1__Bacteroidetes;D_2__Cytophagia;D_3__Cytophagales;D_4__Cytophagaceae;__;__;__;__;__;__;__;__;__;__;__;__	D_0__Bacteria;D_1__Bacteroidetes;D_2__Flavobacteriia;D_3__Flavobacteriales;D_4__Cryomorphaceae;D_5__Fluviicola;D_6__uncultured bacterium;D_7__;D_8__;D_9__;D_10__;D_11__;D_12__;D_13__;D_14__;D_15__;D_16__	D_0__Bacteria;D_1__Bacteroidetes;D_2__Flavobacteriia;D_3__Flavobacteriales;D_4__Cryomorphaceae;__;__;__;__;__;__;__;__;__;__;__;__	D_0__Bacteria;D_1__Bacteroidetes;D_2__Flavobacteriia;D_3__Flavobacteriales;D_4__Flavobacteriaceae;D_5__Chryseobacterium;D_6__uncultured bacterium;D_7__;D_8__;D_9__;D_10__;D_11__;D_12__;D_13__;D_14__;D_15__;D_16__	D_0__Bacteria;D_1__Bacteroidetes;D_2__Flavobacteriia;D_3__Flavobacteriales;D_4__Flavobacteriaceae;D_5__Cloacibacterium;D_6__uncultured bacterium;D_7__;D_8__;D_9__;D_10__;D_11__;D_12__;D_13__;D_14__;D_15__;D_16__	D_0__Bacteria;D_1__Bacteroidetes;D_2__Flavobacteriia;D_3__Flavobacteriales;D_4__Flavobacteriaceae;D_5__Elizabethkingia;D_6__Elizabethkingia meningoseptica;D_7__;D_8__;D_9__;D_10__;D_11__;D_12__;D_13__;D_14__;D_15__;D_16__
Gut.Control.rep10	0	0	0	0	0	0	0	0	16	0	0	0	0	0	0	0	0	0	0	0	0	0	0	0	0	0	0	0	0	0	0	0	0	0	0	0	0	0	0	0	0	0	0	0	0	0	0	0	0
Gut.Control.rep2	0	0	0	0	0	0	0	0	0	0	0	0	0	0	0	44	0	0	0	0	0	0	0	0	19	0	0	0	0	0	0	0	0	0	0	0	0	0	0	0	0	13	0	0	0	0	0	0	0
Gut.Control.rep3	0	0	0	0	3	0	0	0	284	0	0	3	0	0	0	0	0	0	0	0	0	0	0	0	0	0	0	0	0	0	0	0	0	0	0	0	0	0	0	0	0	48	0	4	0	0	0	0	0
Gut.Control.rep7	0	0	0	0	0	0	0	0	0	42	0	0	0	92	0	0	0	0	0	0	0	0	0	0	0	0	0	0	0	0	3	0	0	0	0	196	0	0	0	0	0	7	0	0	0	0	0	0	0
Gut.Control.rep8	0	0	0	0	0	0	0	0	127	0	132	0	0	0	0	0	0	0	279	0	0	0	32	0	0	0	0	58	0	0	0	0	134	0	0	0	0	0	0	0	0	0	0	0	0	0	0	0	0
Gut.Control.rep9	37	0	0	0	0	0	0	0	0	0	0	0	0	0	0	0	0	0	0	0	0	0	0	0	0	0	0	0	0	0	0	0	0	0	230	0	0	0	0	0	0	3	0	2	0	0	0	3	0
Gut.HF.rep1	0	0	0	0	0	0	0	0	193	0	88	0	108	0	0	0	0	0	0	0	0	0	0	0	0	0	0	0	0	0	0	67	0	0	0	6406	0	0	0	0	5	12	26	0	7	0	0	0	4
Gut.HF.rep10	0	31	0	0	0	0	0	37	0	37	0	0	0	0	61	0	0	0	0	0	74	0	0	0	0	0	0	0	0	41	0	0	0	0	0	25	0	0	0	0	0	0	0	0	0	0	0	0	0
Gut.HF.rep2	0	0	0	3	0	0	0	0	48	0	0	0	0	0	0	0	0	0	0	0	0	0	34	0	0	3	0	0	0	0	0	0	0	0	0	8258	0	0	0	0	0	7	0	0	5	0	9	0	0
Gut.HF.rep3	0	0	0	0	0	0	0	0	8	0	0	0	0	0	0	0	0	0	0	0	0	0	0	0	0	0	0	0	0	0	0	0	0	0	0	5921	0	0	0	0	0	5	0	0	0	0	0	0	0
Gut.HF.rep4	0	0	0	0	0	0	0	0	265	0	0	0	0	0	0	0	0	0	0	0	0	0	0	0	0	0	0	0	251	0	0	0	0	0	0	1207	0	0	0	0	0	0	0	0	0	0	0	0	0
Gut.HF.rep6	0	0	25	0	0	0	0	0	0	0	0	0	0	0	0	0	0	0	0	0	0	0	0	0	0	0	0	0	0	0	0	0	0	0	0	84	0	0	0	0	0	0	0	0	0	0	0	0	0
Gut.HF.rep7	0	0	0	0	0	0	0	0	42	0	0	0	0	0	0	0	0	0	0	0	0	0	0	0	0	0	0	0	0	0	0	0	0	0	352	3841	0	0	0	0	0	0	0	0	46	0	6	0	0
Gut.HF.rep8	0	0	0	0	0	7	3	0	125	0	0	0	0	0	0	40	0	0	0	32	0	0	5	0	0	0	0	0	0	0	0	0	0	0	0	207	0	0	0	0	0	19	0	3	0	2	0	0	0
Gut.HF.rep9	0	0	0	0	0	0	0	65	39	0	0	0	0	0	0	0	109	0	104	0	0	0	0	0	0	0	0	0	0	0	0	0	0	0	0	1729	0	0	0	0	0	0	3	5	0	0	0	0	0
Media.Control.rep1	0	0	0	0	0	0	0	0	21	0	0	0	0	0	0	0	39	9	0	0	0	8	0	0	0	29	37	0	0	0	0	0	0	53	846	1232	4	0	0	0	23	0	0	0	377	0	0	0	0
Media.Control.rep2	0	0	0	0	0	0	0	0	0	0	0	0	0	0	0	22	15	84	0	0	0	0	0	31	0	0	0	0	0	0	0	0	0	304	5051	2716	71	610	63	107	924	0	0	0	3987	0	49	0	0
Media.Control.rep3	0	0	0	0	0	0	0	0	13	0	0	0	0	0	0	0	20	38	0	0	0	0	0	70	0	0	0	0	0	0	0	0	0	106	2838	2250	32	118	0	0	0	0	0	0	945	0	11	0	0
Media.HF.rep1	0	0	0	0	0	0	0	0	0	0	0	0	0	0	0	0	0	0	0	0	0	0	0	0	0	0	0	0	0	0	0	0	0	5	160	12039	4	0	0	13	0	0	0	0	0	0	0	0	0
Media.HF.rep2	0	0	0	0	0	0	0	0	0	0	0	0	0	0	0	0	0	0	0	0	0	0	0	0	0	0	0	0	0	0	0	0	0	3	173	15288	4	0	0	12	0	0	0	0	108	0	5	0	0
Media.HF.rep3	0	0	0	0	0	0	0	0	0	0	0	0	0	0	0	0	0	0	0	0	0	0	0	0	0	0	0	0	0	0	0	0	0	0	167	14439	0	8	0	0	0	0	0	0	33	0	11	0	0
[truncated: 237 more columns]

## Sheet: level-6 (genus)
Sample name	D_0__Archaea;D_1__Euryarchaeota;D_2__Halobacteria;D_3__Halobacteriales;D_4__Halobacteriaceae;D_5__Halarchaeum	D_0__Archaea;D_1__Euryarchaeota;D_2__Methanobacteria;D_3__Methanobacteriales;D_4__Methanobacteriaceae;D_5__Methanothermobacter	D_0__Bacteria;D_1__Acidobacteria;D_2__Acidobacteria;D_3__Acidobacteriales;D_4__Acidobacteriaceae (Subgroup 1);D_5__Terriglobus	D_0__Bacteria;D_1__Actinobacteria;D_2__Acidimicrobiia;D_3__Acidimicrobiales;D_4__Iamiaceae;D_5__Iamia	D_0__Bacteria;D_1__Actinobacteria;D_2__Acidimicrobiia;D_3__Acidimicrobiales;D_4__uncultured;D_5__uncultured bacterium	D_0__Bacteria;D_1__Actinobacteria;D_2__Actinobacteria;D_3__Actinomycetales;D_4__Actinomycetaceae;D_5__Actinomyces	D_0__Bacteria;D_1__Actinobacteria;D_2__Actinobacteria;D_3__Bifidobacteriales;D_4__Bifidobacteriaceae;D_5__Bifidobacterium	D_0__Bacteria;D_1__Actinobacteria;D_2__Actinobacteria;D_3__Corynebacteriales;D_4__Corynebacteriaceae;D_5__Corynebacterium	D_0__Bacteria;D_1__Actinobacteria;D_2__Actinobacteria;D_3__Corynebacteriales;D_4__Corynebacteriaceae;D_5__uncultured	D_0__Bacteria;D_1__Actinobacteria;D_2__Actinobacteria;D_3__Corynebacteriales;D_4__Mycobacteriaceae;D_5__Mycobacterium	D_0__Bacteria;D_1__Actinobacteria;D_2__Actinobacteria;D_3__Micrococcales;D_4__Bogoriellaceae;D_5__Georgenia	D_0__Bacteria;D_1__Actinobacteria;D_2__Actinobacteria;D_3__Micrococcales;D_4__Intrasporangiaceae;__	D_0__Bacteria;D_1__Actinobacteria;D_2__Actinobacteria;D_3__Micrococcales;D_4__Microbacteriaceae;D_5__Agromyces	D_0__Bacteria;D_1__Actinobacteria;D_2__Actinobacteria;D_3__Micrococcales;D_4__Microbacteriaceae;D_5__Leucobacter	D_0__Bacteria;D_1__Actinobacteria;D_2__Actinobacteria;D_3__Micrococcales;D_4__Microbacteriaceae;D_5__Lysinimonas	D_0__Bacteria;D_1__Actinobacteria;D_2__Actinobacteria;D_3__Micrococcales;D_4__Micrococcaceae;D_5__Arthrobacter	D_0__Bacteria;D_1__Actinobacteria;D_2__Actinobacteria;D_3__Micrococcales;D_4__Micrococcaceae;D_5__Kocuria	D_0__Bacteria;D_1__Actinobacteria;D_2__Actinobacteria;D_3__Micrococcales;D_4__Micrococcaceae;D_5__Micrococcus	D_0__Bacteria;D_1__Actinobacteria;D_2__Actinobacteria;D_3__Propionibacteriales;D_4__Nocardioidaceae;D_5__Nocardioides	D_0__Bacteria;D_1__Actinobacteria;D_2__Actinobacteria;D_3__Propionibacteriales;D_4__Propionibacteriaceae;D_5__Propionibacterium	D_0__Bacteria;D_1__Actinobacteria;D_2__Actinobacteria;D_3__Pseudonocardiales;D_4__Pseudonocardiaceae;D_5__Pseudonocardia	D_0__Bacteria;D_1__Actinobacteria;D_2__Actinobacteria;D_3__Pseudonocardiales;D_4__Pseudonocardiaceae;D_5__Saccharopolyspora	D_0__Bacteria;D_1__Armatimonadetes;D_2__uncultured bacterium;D_3__;D_4__;D_5__	D_0__Bacteria;D_1__BD1-5;D_2__uncultured soil bacterium;D_3__;D_4__;D_5__	D_0__Bacteria;D_1__Bacteroidetes;D_2__Bacteroidia;D_3__Bacteroidales;D_4__Bacteroidaceae;D_5__Bacteroides	D_0__Bacteria;D_1__Bacteroidetes;D_2__Bacteroidia;D_3__Bacteroidales;D_4__Porphyromonadaceae;D_5__Proteiniphilum	D_0__Bacteria;D_1__Bacteroidetes;D_2__Bacteroidia;D_3__Bacteroidales;D_4__Porphyromonadaceae;D_5__uncultured	D_0__Bacteria;D_1__Bacteroidetes;D_2__Bacteroidia;D_3__Bacteroidales;D_4__Prevotellaceae;D_5__Alloprevotella	D_0__Bacteria;D_1__Bacteroidetes;D_2__Bacteroidia;D_3__Bacteroidales;D_4__S24-7;D_5__uncultured bacterium	D_0__Bacteria;D_1__Bacteroidetes;D_2__Cytophagia;D_3__Cytophagales;D_4__Cytophagaceae;D_5__Dyadobacter	D_0__Bacteria;D_1__Bacteroidetes;D_2__Cytophagia;D_3__Cytophagales;D_4__Cytophagaceae;D_5__Emticicia	D_0__Bacteria;D_1__Bacteroidetes;D_2__Cytophagia;D_3__Cytophagales;D_4__Cytophagaceae;D_5__Flectobacillus	D_0__Bacteria;D_1__Bacteroidetes;D_2__Cytophagia;D_3__Cytophagales;D_4__Cytophagaceae;D_5__Flexibacter	D_0__Bacteria;D_1__Bacteroidetes;D_2__Cytophagia;D_3__Cytophagales;D_4__Cytophagaceae;D_5__Runella	D_0__Bacteria;D_1__Bacteroidetes;D_2__Cytophagia;D_3__Cytophagales;D_4__Cytophagaceae;D_5__Spirosoma	D_0__Bacteria;D_1__Bacteroidetes;D_2__Cytophagia;D_3__Cytophagales;D_4__Cytophagaceae;D_5__uncultured	D_0__Bacteria;D_1__Bacteroidetes;D_2__Cytophagia;D_3__Cytophagales;D_4__Cytophagaceae;D_5__uncultured Bacteroidetes bacterium	D_0__Bacteria;D_1__Bacteroidetes;D_2__Cytophagia;D_3__Cytophagales;D_4__Cytophagaceae;__	D_0__Bacteria;D_1__Bacteroidetes;D_2__Flavobacteriia;D_3__Flavobacteriales;D_4__Cryomorphaceae;D_5__Fluviicola	D_0__Bacteria;D_1__Bacteroidetes;D_2__Flavobacteriia;D_3__Flavobacteriales;D_4__Cryomorphaceae;__	D_0__Bacteria;D_1__Bacteroidetes;D_2__Flavobacteriia;D_3__Flavobacteriales;D_4__Flavobacteriaceae;D_5__Chryseobacterium	D_0__Bacteria;D_1__Bacteroidetes;D_2__Flavobacteriia;D_3__Flavobacteriales;D_4__Flavobacteriaceae;D_5__Cloacibacterium	D_0__Bacteria;D_1__Bacteroidetes;D_2__Flavobacteriia;D_3__Flavobacteriales;D_4__Flavobacteriaceae;D_5__Elizabethkingia	D_0__Bacteria;D_1__Bacteroidetes;D_2__Flavobacteriia;D_3__Flavobacteriales;D_4__Flavobacteriaceae;D_5__Flavobacterium	D_0__Bacteria;D_1__Bacteroidetes;D_2__Sphingobacteriia;D_3__Sphingobacteriales;D_4__Chitinophagaceae;D_5__Chitinophaga	D_0__Bacteria;D_1__Bacteroidetes;D_2__Sphingobacteriia;D_3__Sphingobacteriales;D_4__Chitinophagaceae;D_5__Ferruginibacter	D_0__Bacteria;D_1__Bacteroidetes;D_2__Sphingobacteriia;D_3__Sphingobacteriales;D_4__Chitinophagaceae;D_5__Flavihumibacter	D_0__Bacteria;D_1__Bacteroidetes;D_2__Sphingobacteriia;D_3__Sphingobacteriales;D_4__Chitinophagaceae;D_5__Sediminibacterium	D_0__Bacteria;D_1__Bacteroidetes;D_2__Sphingobacteriia;D_3__Sphingobacteriales;D_4__Chitinophagaceae;D_5__Taibaiella
Gut.Control.rep10	0	0	0	0	0	0	0	16	0	0	0	0	0	0	0	0	0	0	0	0	0	0	0	0	0	0	0	0	0	0	0	0	0	0	0	0	0	0	0	0	0	0	0	0	9	0	17	0	0
Gut.Control.rep2	0	0	0	0	0	0	0	0	0	0	0	0	0	44	0	0	0	0	0	0	0	19	0	0	0	0	0	0	0	0	0	0	0	0	0	13	0	0	0	0	0	0	0	0	4	0	0	0	0
Gut.Control.rep3	0	0	0	0	3	0	0	284	0	3	0	0	0	0	0	0	0	0	0	0	0	0	0	0	0	0	0	0	0	0	0	0	0	0	0	48	0	4	0	0	0	0	0	5	17	0	0	0	0
Gut.Control.rep7	0	0	0	0	0	0	0	42	0	0	0	92	0	0	0	0	0	0	0	0	0	0	0	0	0	0	3	0	0	0	0	196	0	0	0	7	0	0	0	0	0	0	0	0	6	0	37	0	0
Gut.Control.rep8	0	0	0	0	0	0	0	127	132	0	0	0	0	0	0	0	279	0	0	32	0	0	0	0	58	0	0	0	134	0	0	0	0	0	0	0	0	0	0	0	0	0	0	3	8	0	30	0	0
Gut.Control.rep9	37	0	0	0	0	0	0	0	0	0	0	0	0	0	0	0	0	0	0	0	0	0	0	0	0	0	0	0	0	0	230	0	0	0	0	3	0	2	0	0	0	3	0	0	7	0	60	0	0
Gut.HF.rep1	0	0	0	0	0	0	0	193	88	0	108	0	0	0	0	0	0	0	0	0	0	0	0	0	0	0	0	67	0	0	0	6406	0	0	0	43	0	0	7	0	0	0	4	0	0	0	0	0	0
Gut.HF.rep10	0	31	0	0	0	0	37	37	0	0	0	0	61	0	0	0	0	74	0	0	0	0	0	0	0	41	0	0	0	0	0	25	0	0	0	0	0	0	0	0	0	0	0	0	0	0	0	0	0
Gut.HF.rep2	0	0	0	3	0	0	0	48	0	0	0	0	0	0	0	0	0	0	0	34	0	0	3	0	0	0	0	0	0	0	0	8258	0	0	0	7	0	0	5	0	9	0	0	0	0	0	0	0	3
Gut.HF.rep3	0	0	0	0	0	0	0	8	0	0	0	0	0	0	0	0	0	0	0	0	0	0	0	0	0	0	0	0	0	0	0	5921	0	0	0	5	0	0	0	0	0	0	0	0	11	0	72	0	0
Gut.HF.rep4	0	0	0	0	0	0	0	265	0	0	0	0	0	0	0	0	0	0	0	0	0	0	0	0	251	0	0	0	0	0	0	1207	0	0	0	0	0	0	0	0	0	0	0	0	3	0	52	0	0
Gut.HF.rep6	0	0	25	0	0	0	0	0	0	0	0	0	0	0	0	0	0	0	0	0	0	0	0	0	0	0	0	0	0	0	0	84	0	0	0	0	0	0	0	0	0	0	0	0	27	0	74	0	0
Gut.HF.rep7	0	0	0	0	0	0	0	42	0	0	0	0	0	0	0	0	0	0	0	0	0	0	0	0	0	0	0	0	0	0	352	3841	0	0	0	0	0	0	46	0	6	0	0	0	15	0	59	0	0
Gut.HF.rep8	0	0	0	0	0	10	0	125	0	0	0	0	0	40	0	0	0	32	0	5	0	0	0	0	0	0	0	0	0	0	0	207	0	0	0	19	0	3	0	2	0	0	0	0	10	6	0	0	0
Gut.HF.rep9	0	0	0	0	0	0	65	39	0	0	0	0	0	0	109	0	104	0	0	0	0	0	0	0	0	0	0	0	0	0	0	1729	0	0	0	3	0	5	0	0	0	0	0	0	11	0	0	4	0
Media.Control.rep1	0	0	0	0	0	0	0	21	0	0	0	0	0	0	39	9	0	0	8	0	0	0	29	37	0	0	0	0	0	53	846	1232	4	0	0	23	0	0	377	0	0	0	0	229	0	0	0	0	10
Media.Control.rep2	0	0	0	0	0	0	0	0	0	0	0	0	0	22	15	84	0	0	0	0	31	0	0	0	0	0	0	0	0	304	5051	2716	71	610	63	924	107	0	3987	0	49	0	0	2921	174	0	0	0	272
Media.Control.rep3	0	0	0	0	0	0	0	13	0	0	0	0	0	0	20	38	0	0	0	0	70	0	0	0	0	0	0	0	0	106	2838	2250	32	118	0	0	0	0	945	0	11	0	0	537	0	0	0	0	332
Media.HF.rep1	0	0	0	0	0	0	0	0	0	0	0	0	0	0	0	0	0	0	0	0	0	0	0	0	0	0	0	0	0	5	160	12039	4	0	0	0	13	0	0	0	0	0	0	45	0	0	0	0	32
Media.HF.rep2	0	0	0	0	0	0	0	0	0	0	0	0	0	0	0	0	0	0	0	0	0	0	0	0	0	0	0	0	0	3	173	15288	4	0	0	0	12	0	108	0	5	0	0	21	0	0	0	0	31
Media.HF.rep3	0	0	0	0	0	0	0	0	0	0	0	0	0	0	0	0	0	0	0	0	0	0	0	0	0	0	0	0	0	0	167	14439	0	8	0	0	0	0	33	0	11	0	0	16	0	0	0	0	18
[truncated: 192 more columns]

## Sheet: level-3 (class)
Sample name	D_0__Archaea;D_1__Euryarchaeota;D_2__Halobacteria	D_0__Archaea;D_1__Euryarchaeota;D_2__Methanobacteria	D_0__Bacteria;D_1__Acidobacteria;D_2__Acidobacteria	D_0__Bacteria;D_1__Actinobacteria;D_2__Acidimicrobiia	D_0__Bacteria;D_1__Actinobacteria;D_2__Actinobacteria	D_0__Bacteria;D_1__Armatimonadetes;D_2__uncultured bacterium	D_0__Bacteria;D_1__BD1-5;D_2__uncultured soil bacterium	D_0__Bacteria;D_1__Bacteroidetes;D_2__Bacteroidia	D_0__Bacteria;D_1__Bacteroidetes;D_2__Cytophagia	D_0__Bacteria;D_1__Bacteroidetes;D_2__Flavobacteriia	D_0__Bacteria;D_1__Bacteroidetes;D_2__Sphingobacteriia	D_0__Bacteria;D_1__Bacteroidetes;__	D_0__Bacteria;D_1__CKC4;D_2__uncultured bacterium	D_0__Bacteria;D_1__Candidate division OD1;D_2__uncultured bacterium	D_0__Bacteria;D_1__Chlamydiae;D_2__Chlamydiae	D_0__Bacteria;D_1__Chlorobi;D_2__Chlorobia	D_0__Bacteria;D_1__Chloroflexi;D_2__Ktedonobacteria	D_0__Bacteria;D_1__Cyanobacteria;D_2__Chloroplast	D_0__Bacteria;D_1__Cyanobacteria;D_2__ML635J-21	D_0__Bacteria;D_1__Cyanobacteria;D_2__Melainabacteria	D_0__Bacteria;D_1__Deinococcus-Thermus;D_2__Deinococci	D_0__Bacteria;D_1__Firmicutes;D_2__Bacilli	D_0__Bacteria;D_1__Firmicutes;D_2__Clostridia	D_0__Bacteria;D_1__Firmicutes;D_2__Negativicutes	D_0__Bacteria;D_1__Fusobacteria;D_2__Fusobacteriia	D_0__Bacteria;D_1__Nitrospirae;D_2__Nitrospira	D_0__Bacteria;D_1__OC31;D_2__uncultured bacterium	D_0__Bacteria;D_1__Planctomycetes;D_2__Phycisphaerae	D_0__Bacteria;D_1__Planctomycetes;D_2__Planctomycetacia	D_0__Bacteria;D_1__Proteobacteria;D_2__Alphaproteobacteria	D_0__Bacteria;D_1__Proteobacteria;D_2__Betaproteobacteria	D_0__Bacteria;D_1__Proteobacteria;D_2__Deltaproteobacteria	D_0__Bacteria;D_1__Proteobacteria;D_2__Gammaproteobacteria	D_0__Bacteria;D_1__SHA-109;D_2__uncultured bacterium	D_0__Bacteria;D_1__Spirochaetae;D_2__Spirochaetes	D_0__Bacteria;D_1__TM6;D_2__uncultured bacterium	D_0__Bacteria;D_1__Verrucomicrobia;D_2__Opitutae	D_0__Bacteria;D_1__Verrucomicrobia;D_2__Verrucomicrobia Incertae Sedis	D_0__Bacteria;__;__	Unassigned;__;__	BarcodeSequence	LinkerPrimerSequence	PrimerID	SampleID_original	sample type	condition	condition_desc
Gut.Control.rep10	0	0	0	0	16	0	0	0	0	0	40	0	21	0	0	0	0	0	0	0	0	127	4	0	17	0	0	0	45	434	1087	0	149635	0	0	0	0	0	1869	41	GTCGCTTGCACA	CAAGCAGAAGACGGCATACGAGAT	806rcbc908	CV-6h-NE-10	Gut	cv.g.c	Conventionalized(CV), Control group, gut sample
Gut.Control.rep2	0	0	0	0	63	0	0	0	13	0	7	0	24	0	0	0	9	0	0	0	0	150	0	0	69	0	0	0	0	568	34035	0	89229	0	0	0	0	3	1008	12	GAATATACCTGG	CAAGCAGAAGACGGCATACGAGAT	806rcbc907	CV-6h-NE-2	Gut	cv.g.c	Conventionalized(CV), Control group, gut sample
Gut.Control.rep3	0	0	0	3	287	0	0	0	52	5	43	8	13	0	0	0	25	0	0	0	0	115	325	0	109	6	0	0	12	1942	52037	6	77851	0	0	0	6	6	2745	0	GTATGGAGCTAT	CAAGCAGAAGACGGCATACGAGAT	806rcbc919	CV-6h-NE-3	Gut	cv.g.c	Conventionalized(CV), Control group, gut sample
Gut.Control.rep7	0	0	0	0	134	0	0	3	203	0	232	0	31	0	5	0	0	0	0	0	11	437	0	0	59	0	0	0	57	1410	13438	62	70526	0	0	0	0	0	1522	0	ACCCTATTGCGG	CAAGCAGAAGACGGCATACGAGAT	806rcbc872	CV-6h-NE-7	Gut	cv.g.c	Conventionalized(CV), Control group, gut sample
Gut.Control.rep8	0	0	0	0	570	0	0	192	0	3	56	0	30	0	151	0	0	0	0	0	0	469	671	0	66	0	0	2	40	505	2183	154	63719	0	0	0	0	0	7066	218	ATTCCCAGAACG	CAAGCAGAAGACGGCATACGAGAT	806rcbc884	CV-6h-NE-8	Gut	cv.g.c	Conventionalized(CV), Control group, gut sample
Gut.Control.rep9	37	0	0	0	0	0	0	0	235	3	93	0	43	0	0	0	0	44	0	0	0	109	0	0	14	0	0	0	30	502	745	2	114610	4	0	0	0	0	1619	20	ATCGTGTGTTGG	CAAGCAGAAGACGGCATACGAGAT	806rcbc896	CV-6h-NE-9	Gut	cv.g.c	Conventionalized(CV), Control group, gut sample
Gut.HF.rep1	0	0	0	0	389	0	0	67	6449	11	22	0	13	0	0	5	18	0	0	0	29	214	0	0	129	0	0	0	6	305	3843	61	123749	0	0	0	0	8	2022	0	CCTTCTGTATAC	CAAGCAGAAGACGGCATACGAGAT	806rcbc920	CV-6h-EY-1	Gut	cv.g.t	Conventionalized(CV), Egg yolk treated group, gut sample
Gut.HF.rep10	0	31	0	0	209	0	0	41	25	0	80	0	0	0	0	0	0	0	0	18	33	4498	576	6	0	0	0	0	0	87	1201	0	134114	0	0	0	0	0	831	14	GTACCTAGCCTG	CAAGCAGAAGACGGCATACGAGAT	806rcbc933	CV-6h-EY-10	Gut	cv.g.t	Conventionalized(CV), Egg yolk treated group, gut sample
Gut.HF.rep2	0	0	0	3	82	3	0	0	8265	14	10	0	0	0	0	0	7	0	0	0	0	605	140	0	42	0	0	2	0	1594	2355	12	176356	0	0	0	0	0	4256	75	CTCAAGTCAAAG	CAAGCAGAAGACGGCATACGAGAT	806rcbc932	CV-6h-EY-2	Gut	cv.g.t	Conventionalized(CV), Egg yolk treated group, gut sample
Gut.HF.rep3	0	0	0	0	8	0	0	0	5926	0	105	0	7	0	2	0	0	0	0	0	0	600	0	0	0	0	0	0	40	876	1246	8	133219	0	0	0	0	0	2542	37	AATGTCACCAGA	CAAGCAGAAGACGGCATACGAGAT	806rcbc944	CV-6h-EY-3	Gut	cv.g.t	Conventionalized(CV), Egg yolk treated group, gut sample
Gut.HF.rep4	0	0	0	0	265	0	0	251	1207	0	128	0	53	0	0	0	0	0	0	0	0	225	96	0	166	0	0	0	9	528	25334	0	285301	0	0	0	0	0	3193	96	CAAATGGTCGTC	CAAGCAGAAGACGGCATACGAGAT	806rcbc956	CV-6h-EY-4	Gut	cv.g.t	Conventionalized(CV), Egg yolk treated group, gut sample
Gut.HF.rep6	0	0	25	0	0	0	0	0	84	0	119	0	16	0	3	0	0	0	0	0	0	55	0	0	54	0	0	0	50	259	395	18	164818	0	0	0	0	0	1271	114	AGACGTTGCTAC	CAAGCAGAAGACGGCATACGAGAT	806rcbc885	CV-6h-EY-6	Gut	cv.g.t	Conventionalized(CV), Egg yolk treated group, gut sample
Gut.HF.rep7	0	0	0	0	42	0	0	0	4193	52	97	0	46	0	0	0	0	0	0	0	0	173	0	0	93	0	0	0	0	1283	8249	0	113678	0	0	0	0	0	3772	33	CTTCCGCAGACA	CAAGCAGAAGACGGCATACGAGAT	806rcbc897	CV-6h-EY-7	Gut	cv.g.t	Conventionalized(CV), Egg yolk treated group, gut sample
Gut.HF.rep8	0	0	0	0	212	0	0	0	229	2	23	10	13	0	0	11	6	0	0	2	0	310	0	0	80	0	0	3	0	283	16409	33	131736	0	0	0	0	0	1352	42	TCTACCACGAAG	CAAGCAGAAGACGGCATACGAGAT	806rcbc909	CV-6h-EY-8	Gut	cv.g.t	Conventionalized(CV), Egg yolk treated group, gut sample
Gut.HF.rep9	0	0	0	0	317	0	0	0	1737	0	22	13	2	0	0	0	3	61	0	0	0	449	0	0	104	0	0	0	0	1517	7692	22	67471	2	0	0	0	0	1039	0	ACGCTGTCGGTT	CAAGCAGAAGACGGCATACGAGAT	806rcbc921	CV-6h-EY-9	Gut	cv.g.t	Conventionalized(CV), Egg yolk treated group, gut sample
Media.Control.rep1	0	0	0	0	77	29	37	0	2158	606	204	0	0	0	565	255	0	530	4	0	2271	56	46	0	0	0	0	0	0	4803	103111	2691	13488	0	0	0	0	0	794	186	CAGCCTGCAAAT	CAAGCAGAAGACGGCATACGAGAT	806rcbc945	CV-6h-NE-w-1	Media	cv.m.c	Conventionalized(CV), Control group, media sample
Media.Control.rep2	0	0	0	0	152	0	0	0	9846	6957	1893	0	0	12	557	92	10	307	0	0	4956	44	0	0	0	0	0	0	0	7279	93182	4351	18204	0	45	0	0	0	739	0	ACACATAAGTCG	CAAGCAGAAGACGGCATACGAGAT	806rcbc957	CV-6h-NE-w-2	Media	cv.m.c	Conventionalized(CV), Control group, media sample
Media.Control.rep3	0	0	0	0	141	0	0	0	5344	1493	1021	0	0	5	441	44	0	737	14	22	3603	36	0	20	0	0	53	0	0	2897	100103	3374	6791	0	0	35	0	0	1297	0	ACCACCGTAACC	CAAGCAGAAGACGGCATACGAGAT	806rcbc874	CV-6h-NE-w-3	Media	cv.m.c	Conventionalized(CV), Control group, media sample
Media.HF.rep1	0	0	0	0	0	0	0	0	12221	45	98	0	0	0	0	0	0	31	0	0	40	0	0	0	0	0	0	0	0	209	13243	32	101819	0	0	0	0	0	18	0	AGAATAGCGCTT	CAAGCAGAAGACGGCATACGAGAT	806rcbc886	CV-6h-EY-w-1	Media	cv.m.t	Conventionalized(CV), Egg yolk treated group, media sample
Media.HF.rep2	0	0	0	0	0	0	0	0	15480	134	113	0	0	0	0	0	0	44	0	0	56	7	0	0	0	0	0	0	0	84	18745	29	71695	0	0	0	0	0	25	0	GCACTATACGCA	CAAGCAGAAGACGGCATACGAGAT	806rcbc898	CV-6h-EY-w-2	Media	cv.m.t	Conventionalized(CV), Egg yolk treated group, media sample
Media.HF.rep3	0	0	0	0	0	0	0	0	14614	60	120	0	0	0	3	0	0	31	0	0	61	0	0	0	0	0	0	0	0	45	20191	11	58986	0	0	0	0	0	26	0	AATATCGGGATC	CAAGCAGAAGACGGCATACGAGAT	806rcbc910	CV-6h-EY-w-3	Media	cv.m.t	Conventionalized(CV), Egg yolk treated group, media sample
