# Supplementary material for: High fat diet induces microbiota-dependent silencing of enteroendocrine cells
Source: eLife. 2019 Dec 3;8:e48479. doi: 10.7554/eLife.48479 (PMC6937151; doi:10.7554/eLife.48479)
Supplement: Supplementary file 3. [file elife-48479-supp3.xlsx]

## Sheet: LEfSe media
LEfSe analysis of 16S rRNA gene sequences from high-fat fed and control zebrafish media
Feature	highest class average	condition	LDA effect size	p-value
D_0__Bacteria	6			-
D_0__Bacteria.D_1__Actinobacteria	2.95639	Media.Control	2.94748	0.036904
D_0__Bacteria.D_1__Actinobacteria.D_2__Actinobacteria	2.95639	Media.Control	2.95965	0.036904
D_0__Bacteria.D_1__Actinobacteria.D_2__Actinobacteria.D_3__Corynebacteriales	1.9402			-
D_0__Bacteria.D_1__Actinobacteria.D_2__Actinobacteria.D_3__Corynebacteriales.D_4__Corynebacteriaceae	1.9402			-
D_0__Bacteria.D_1__Actinobacteria.D_2__Actinobacteria.D_3__Corynebacteriales.D_4__Corynebacteriaceae.D_5__Corynebacterium	1.9402			-
D_0__Bacteria.D_1__Actinobacteria.D_2__Actinobacteria.D_3__Micrococcales	2.736	Media.Control	2.85295	0.036904
D_0__Bacteria.D_1__Actinobacteria.D_2__Actinobacteria.D_3__Micrococcales.D_4__Microbacteriaceae	2.36916	Media.Control	3.62513	0.036904
D_0__Bacteria.D_1__Actinobacteria.D_2__Actinobacteria.D_3__Micrococcales.D_4__Microbacteriaceae.D_5__Leucobacter	1.69321			-
D_0__Bacteria.D_1__Actinobacteria.D_2__Actinobacteria.D_3__Micrococcales.D_4__Microbacteriaceae.D_5__Lysinimonas	2.26631	Media.Control	3.04486	0.036904
D_0__Bacteria.D_1__Actinobacteria.D_2__Actinobacteria.D_3__Micrococcales.D_4__Micrococcaceae	2.49211	Media.Control	2.71497	0.036904
D_0__Bacteria.D_1__Actinobacteria.D_2__Actinobacteria.D_3__Micrococcales.D_4__Micrococcaceae.D_5__Arthrobacter	2.49211	Media.Control	2.71665	0.036904
D_0__Bacteria.D_1__Actinobacteria.D_2__Actinobacteria.D_3__Propionibacteriales	1.3063			-
D_0__Bacteria.D_1__Actinobacteria.D_2__Actinobacteria.D_3__Propionibacteriales.D_4__Nocardioidaceae	1.3063			-
D_0__Bacteria.D_1__Actinobacteria.D_2__Actinobacteria.D_3__Propionibacteriales.D_4__Nocardioidaceae.D_5__Nocardioides	1.3063			-
D_0__Bacteria.D_1__Actinobacteria.D_2__Actinobacteria.D_3__Pseudonocardiales	2.40239			-
D_0__Bacteria.D_1__Actinobacteria.D_2__Actinobacteria.D_3__Pseudonocardiales.D_4__Pseudonocardiaceae	2.40239			-
D_0__Bacteria.D_1__Actinobacteria.D_2__Actinobacteria.D_3__Pseudonocardiales.D_4__Pseudonocardiaceae.D_5__Pseudonocardia	2.40239			-
D_0__Bacteria.D_1__Armatimonadetes	1.86561			-
D_0__Bacteria.D_1__Armatimonadetes.D_2__unculturedbacterium	1.86561			-
D_0__Bacteria.D_1__Armatimonadetes.D_2__unculturedbacterium.D_3__	1.86561			-
D_0__Bacteria.D_1__Armatimonadetes.D_2__unculturedbacterium.D_3__.D_4__	1.86561			-
D_0__Bacteria.D_1__Armatimonadetes.D_2__unculturedbacterium.D_3__.D_4__.D_5__	1.86561			-
D_0__Bacteria.D_1__Bacteroidetes	5.12679			-
D_0__Bacteria.D_1__Bacteroidetes.D_2__Cytophagia	5.12096	Media.HF	4.65568	0.0495346
D_0__Bacteria.D_1__Bacteroidetes.D_2__Cytophagia.D_3__Cytophagales	5.12096	Media.HF	4.63155	0.0495346
D_0__Bacteria.D_1__Bacteroidetes.D_2__Cytophagia.D_3__Cytophagales.D_4__Cytophagaceae	5.12096	Media.HF	4.63276	0.0495346
D_0__Bacteria.D_1__Bacteroidetes.D_2__Cytophagia.D_3__Cytophagales.D_4__Cytophagaceae.D_5__Dyadobacter	3.03866	Media.Control	2.83919	0.0495346
D_0__Bacteria.D_1__Bacteroidetes.D_2__Cytophagia.D_3__Cytophagales.D_4__Cytophagaceae.D_5__Emticicia	4.31995	Media.Control	4.01154	0.0495346
D_0__Bacteria.D_1__Bacteroidetes.D_2__Cytophagia.D_3__Cytophagales.D_4__Cytophagaceae.D_5__Flectobacillus	5.11535	Media.HF	4.76275	0.0495346
D_0__Bacteria.D_1__Bacteroidetes.D_2__Cytophagia.D_3__Cytophagales.D_4__Cytophagaceae.D_5__Flexibacter	2.40319			-
D_0__Bacteria.D_1__Bacteroidetes.D_2__Cytophagia.D_3__Cytophagales.D_4__Cytophagaceae.D_5__Runella	3.22444			-
D_0__Bacteria.D_1__Bacteroidetes.D_2__Cytophagia.D_3__Cytophagales.D_4__Cytophagaceae.D_5__Spirosoma	2.15012			-
D_0__Bacteria.D_1__Bacteroidetes.D_2__Cytophagia.D_3__Cytophagales.D_4__Cytophagaceae.D_5__uncultured	3.32849			-
D_0__Bacteria.D_1__Bacteroidetes.D_2__Cytophagia.D_3__Cytophagales.D_4__Cytophagaceae.D_5__unculturedBacteroidetesbacterium	2.38017			-
D_0__Bacteria.D_1__Bacteroidetes.D_2__Flavobacteriia	4.32306	Media.Control	4.005	0.0495346
D_0__Bacteria.D_1__Bacteroidetes.D_2__Flavobacteriia.D_3__Flavobacteriales	4.32306	Media.Control	4.00832	0.0495346
D_0__Bacteria.D_1__Bacteroidetes.D_2__Flavobacteriia.D_3__Flavobacteriales.D_4__Cryomorphaceae	4.09227	Media.Control	3.75143	0.0495346
D_0__Bacteria.D_1__Bacteroidetes.D_2__Flavobacteriia.D_3__Flavobacteriales.D_4__Cryomorphaceae.D_5__Fluviicola	4.09227	Media.Control	3.76924	0.0495346
D_0__Bacteria.D_1__Bacteroidetes.D_2__Flavobacteriia.D_3__Flavobacteriales.D_4__Flavobacteriaceae	3.93819	Media.Control	3.61552	0.0495346
D_0__Bacteria.D_1__Bacteroidetes.D_2__Flavobacteriia.D_3__Flavobacteriales.D_4__Flavobacteriaceae.D_5__Chryseobacterium	2.14195			-
D_0__Bacteria.D_1__Bacteroidetes.D_2__Flavobacteriia.D_3__Flavobacteriales.D_4__Flavobacteriaceae.D_5__Flavobacterium	3.9312	Media.Control	3.62829	0.0495346
D_0__Bacteria.D_1__Bacteroidetes.D_2__Sphingobacteriia	3.87109	Media.Control	3.51541	0.0495346
D_0__Bacteria.D_1__Bacteroidetes.D_2__Sphingobacteriia.D_3__Sphingobacteriales	3.87109	Media.Control	3.54161	0.0495346
D_0__Bacteria.D_1__Bacteroidetes.D_2__Sphingobacteriia.D_3__Sphingobacteriales.D_4__Chitinophagaceae	3.38379			-
D_0__Bacteria.D_1__Bacteroidetes.D_2__Sphingobacteriia.D_3__Sphingobacteriales.D_4__Chitinophagaceae.D_5__Chitinophaga	2.59133			-
D_0__Bacteria.D_1__Bacteroidetes.D_2__Sphingobacteriia.D_3__Sphingobacteriales.D_4__Chitinophagaceae.D_5__Taibaiella	3.17711			-
D_0__Bacteria.D_1__Bacteroidetes.D_2__Sphingobacteriia.D_3__Sphingobacteriales.D_4__Chitinophagaceae.D_5__uncultured	2.67211			-
D_0__Bacteria.D_1__Bacteroidetes.D_2__Sphingobacteriia.D_3__Sphingobacteriales.D_4__Chitinophagaceae.Other	1.74872			-
D_0__Bacteria.D_1__Bacteroidetes.D_2__Sphingobacteriia.D_3__Sphingobacteriales.D_4__env_OPS17	3.18246	Media.Control	2.98449	0.0463016
D_0__Bacteria.D_1__Bacteroidetes.D_2__Sphingobacteriia.D_3__Sphingobacteriales.D_4__env_OPS17.D_5__unculturedbacterium	3.18246	Media.Control	2.95391	0.0463016
D_0__Bacteria.D_1__Bacteroidetes.D_2__Sphingobacteriia.D_3__Sphingobacteriales.D_4__NS11_12marinegroup	1.88226			-
D_0__Bacteria.D_1__Bacteroidetes.D_2__Sphingobacteriia.D_3__Sphingobacteriales.D_4__NS11_12marinegroup.D_5__unculturedbacterium	1.88226			-
D_0__Bacteria.D_1__Bacteroidetes.D_2__Sphingobacteriia.D_3__Sphingobacteriales.D_4__Saprospiraceae	1.8693			-
D_0__Bacteria.D_1__Bacteroidetes.D_2__Sphingobacteriia.D_3__Sphingobacteriales.D_4__Saprospiraceae.D_5__uncultured	1.8693			-
D_0__Bacteria.D_1__Bacteroidetes.D_2__Sphingobacteriia.D_3__Sphingobacteriales.D_4__Sphingobacteriaceae	3.52367	Media.Control	3.10215	0.0495346
D_0__Bacteria.D_1__Bacteroidetes.D_2__Sphingobacteriia.D_3__Sphingobacteriales.D_4__Sphingobacteriaceae.D_5__Pedobacter	3.47817	Media.Control	3.16549	0.0495346
D_0__Bacteria.D_1__Bacteroidetes.D_2__Sphingobacteriia.D_3__Sphingobacteriales.D_4__Sphingobacteriaceae.D_5__Sphingobacterium	2.605			-
D_0__Bacteria.D_1__BD1_5	1.97141			-
D_0__Bacteria.D_1__BD1_5.D_2__unculturedsoilbacterium	1.97141			-
D_0__Bacteria.D_1__BD1_5.D_2__unculturedsoilbacterium.D_3__	1.97141			-
D_0__Bacteria.D_1__BD1_5.D_2__unculturedsoilbacterium.D_3__.D_4__	1.97141			-
D_0__Bacteria.D_1__BD1_5.D_2__unculturedsoilbacterium.D_3__.D_4__.D_5__	1.97141			-
D_0__Bacteria.D_1__CandidatedivisionOD1	1.60193			-
D_0__Bacteria.D_1__CandidatedivisionOD1.D_2__unculturedbacterium	1.60193			-
D_0__Bacteria.D_1__CandidatedivisionOD1.D_2__unculturedbacterium.D_3__	1.60193			-
D_0__Bacteria.D_1__CandidatedivisionOD1.D_2__unculturedbacterium.D_3__.D_4__	1.60193			-
D_0__Bacteria.D_1__CandidatedivisionOD1.D_2__unculturedbacterium.D_3__.D_4__.D_5__	1.60193			-
D_0__Bacteria.D_1__Chlamydiae	3.58344	Media.Control	3.47083	0.0463016
D_0__Bacteria.D_1__Chlamydiae.D_2__Chlamydiae	3.58344	Media.Control	3.3374	0.0463016
D_0__Bacteria.D_1__Chlamydiae.D_2__Chlamydiae.D_3__Chlamydiales	3.58344	Media.Control	3.49808	0.0463016
D_0__Bacteria.D_1__Chlamydiae.D_2__Chlamydiae.D_3__Chlamydiales.D_4__Parachlamydiaceae	2.23727			-
D_0__Bacteria.D_1__Chlamydiae.D_2__Chlamydiae.D_3__Chlamydiales.D_4__Parachlamydiaceae.D_5__CandidatusProtochlamydia	2.23727			-
D_0__Bacteria.D_1__Chlamydiae.D_2__Chlamydiae.D_3__Chlamydiales.D_4__Simkaniaceae	3.56342	Media.Control	3.3421	0.036904
D_0__Bacteria.D_1__Chlamydiae.D_2__Chlamydiae.D_3__Chlamydiales.D_4__Simkaniaceae.D_5__CandidatusRhabdochlamydia	3.56342	Media.Control	3.35203	0.036904
D_0__Bacteria.D_1__Chlorobi	2.98528	Media.Control	2.80993	0.036904
D_0__Bacteria.D_1__Chlorobi.D_2__Chlorobia	2.98528	Media.Control	2.82418	0.036904
D_0__Bacteria.D_1__Chlorobi.D_2__Chlorobia.D_3__Chlorobiales	2.98528	Media.Control	2.86362	0.036904
D_0__Bacteria.D_1__Chlorobi.D_2__Chlorobia.D_3__Chlorobiales.D_4__OPB56	2.98528	Media.Control	2.79972	0.036904
D_0__Bacteria.D_1__Chlorobi.D_2__Chlorobia.D_3__Chlorobiales.D_4__OPB56.D_5__unculturedbacterium	2.95719	Media.Control	2.88474	0.036904
D_0__Bacteria.D_1__Chlorobi.D_2__Chlorobia.D_3__Chlorobiales.D_4__OPB56.Other	1.78215			-
D_0__Bacteria.D_1__Chloroflexi	1.35078			-
D_0__Bacteria.D_1__Chloroflexi.D_2__Ktedonobacteria	1.35078			-
D_0__Bacteria.D_1__Chloroflexi.D_2__Ktedonobacteria.D_3__C0119	1.35078			-
D_0__Bacteria.D_1__Chloroflexi.D_2__Ktedonobacteria.D_3__C0119.D_4__unculturedbacterium	1.35078			-
D_0__Bacteria.D_1__Chloroflexi.D_2__Ktedonobacteria.D_3__C0119.D_4__unculturedbacterium.D_5__	1.35078			-
D_0__Bacteria.D_1__Cyanobacteria	3.60865	Media.Control	3.28491	0.0495346
D_0__Bacteria.D_1__Cyanobacteria.D_2__Chloroplast	3.59736	Media.Control	3.30984	0.0495346
D_0__Bacteria.D_1__Cyanobacteria.D_2__Chloroplast.D_3__Piceaglauca_whitespruce_	2.72066			-
D_0__Bacteria.D_1__Cyanobacteria.D_2__Chloroplast.D_3__Piceaglauca_whitespruce_.D_4__	2.72066			-
D_0__Bacteria.D_1__Cyanobacteria.D_2__Chloroplast.D_3__Piceaglauca_whitespruce_.D_4__.D_5__	2.72066			-
D_0__Bacteria.D_1__Cyanobacteria.D_2__Chloroplast.Other	3.53546	Media.Control	3.24781	0.0495346
D_0__Bacteria.D_1__Cyanobacteria.D_2__Chloroplast.Other.Other	3.53546	Media.Control	3.28834	0.0495346
D_0__Bacteria.D_1__Cyanobacteria.D_2__Chloroplast.Other.Other.Other	3.53546	Media.Control	3.38839	0.0495346
D_0__Bacteria.D_1__Cyanobacteria.D_2__Melainabacteria	1.75989			-
D_0__Bacteria.D_1__Cyanobacteria.D_2__Melainabacteria.D_3__Obscuribacterales	1.75989			-
D_0__Bacteria.D_1__Cyanobacteria.D_2__Melainabacteria.D_3__Obscuribacterales.D_4__unculturedbacterium	1.75989			-
D_0__Bacteria.D_1__Cyanobacteria.D_2__Melainabacteria.D_3__Obscuribacterales.D_4__unculturedbacterium.D_5__	1.75989			-
D_0__Bacteria.D_1__Cyanobacteria.D_2__ML635J_21	1.66961			-
D_0__Bacteria.D_1__Cyanobacteria.D_2__ML635J_21.D_3__unculturedbacterium	1.00527			-
D_0__Bacteria.D_1__Cyanobacteria.D_2__ML635J_21.D_3__unculturedbacterium.D_4__	1.00527			-
D_0__Bacteria.D_1__Cyanobacteria.D_2__ML635J_21.D_3__unculturedbacterium.D_4__.D_5__	1.00527			-
D_0__Bacteria.D_1__Cyanobacteria.D_2__ML635J_21.D_3__unculturedsoilbacterium	1.5636			-
D_0__Bacteria.D_1__Cyanobacteria.D_2__ML635J_21.D_3__unculturedsoilbacterium.D_4__	1.5636			-
D_0__Bacteria.D_1__Cyanobacteria.D_2__ML635J_21.D_3__unculturedsoilbacterium.D_4__.D_5__	1.5636			-
D_0__Bacteria.D_1__Deinococcus_Thermus	4.41969	Media.Control	4.12839	0.0495346
D_0__Bacteria.D_1__Deinococcus_Thermus.D_2__Deinococci	4.41969	Media.Control	4.12394	0.0495346
D_0__Bacteria.D_1__Deinococcus_Thermus.D_2__Deinococci.D_3__Deinococcales	4.41969	Media.Control	4.10283	0.0495346
D_0__Bacteria.D_1__Deinococcus_Thermus.D_2__Deinococci.D_3__Deinococcales.D_4__Deinococcaceae	4.41969	Media.Control	4.11945	0.0495346
D_0__Bacteria.D_1__Deinococcus_Thermus.D_2__Deinococci.D_3__Deinococcales.D_4__Deinococcaceae.D_5__Deinococcus	4.41969	Media.Control	4.0982	0.0495346
D_0__Bacteria.D_1__Firmicutes	2.70177	Media.Control	3.4524	0.0463016
D_0__Bacteria.D_1__Firmicutes.D_2__Bacilli	2.52444	Media.Control	4.30956	0.0463016
D_0__Bacteria.D_1__Firmicutes.D_2__Bacilli.D_3__Bacillales	2.18719	Media.Control	4.48618	0.0463016
D_0__Bacteria.D_1__Firmicutes.D_2__Bacilli.D_3__Bacillales.D_4__Bacillaceae	1.34099			-
D_0__Bacteria.D_1__Firmicutes.D_2__Bacilli.D_3__Bacillales.D_4__Bacillaceae.D_5__Bacillus	1.34099			-
D_0__Bacteria.D_1__Firmicutes.D_2__Bacilli.D_3__Bacillales.D_4__Paenibacillaceae	1.7427			-
D_0__Bacteria.D_1__Firmicutes.D_2__Bacilli.D_3__Bacillales.D_4__Paenibacillaceae.D_5__Paenibacillus	1.7427			-
D_0__Bacteria.D_1__Firmicutes.D_2__Bacilli.D_3__Bacillales.D_4__Staphylococcaceae	1.90462			-
D_0__Bacteria.D_1__Firmicutes.D_2__Bacilli.D_3__Bacillales.D_4__Staphylococcaceae.D_5__Staphylococcus	1.90462			-
D_0__Bacteria.D_1__Firmicutes.D_2__Bacilli.D_3__Lactobacillales	2.25683	Media.Control	3.49643	0.036904
D_0__Bacteria.D_1__Firmicutes.D_2__Bacilli.D_3__Lactobacillales.D_4__Aerococcaceae	1.60606			-
D_0__Bacteria.D_1__Firmicutes.D_2__Bacilli.D_3__Lactobacillales.D_4__Aerococcaceae.D_5__Globicatella	1.60606			-
D_0__Bacteria.D_1__Firmicutes.D_2__Bacilli.D_3__Lactobacillales.D_4__Streptococcaceae	2.14699			-
D_0__Bacteria.D_1__Firmicutes.D_2__Bacilli.D_3__Lactobacillales.D_4__Streptococcaceae.D_5__Streptococcus	2.14699			-
D_0__Bacteria.D_1__Firmicutes.D_2__Clostridia	2.06597			-
D_0__Bacteria.D_1__Firmicutes.D_2__Clostridia.D_3__Clostridiales	2.06597			-
D_0__Bacteria.D_1__Firmicutes.D_2__Clostridia.D_3__Clostridiales.D_4__FamilyXI	2.06597			-
D_0__Bacteria.D_1__Firmicutes.D_2__Clostridia.D_3__Clostridiales.D_4__FamilyXI.D_5__Peptoniphilus	2.06597			-
D_0__Bacteria.D_1__Firmicutes.D_2__Negativicutes	1.7185			-
D_0__Bacteria.D_1__Firmicutes.D_2__Negativicutes.D_3__Selenomonadales	1.7185			-
D_0__Bacteria.D_1__Firmicutes.D_2__Negativicutes.D_3__Selenomonadales.D_4__Veillonellaceae	1.7185			-
D_0__Bacteria.D_1__Firmicutes.D_2__Negativicutes.D_3__Selenomonadales.D_4__Veillonellaceae.D_5__Veillonella	1.7185			-
D_0__Bacteria.D_1__OC31	2.14174			-
D_0__Bacteria.D_1__OC31.D_2__unculturedbacterium	2.14174			-
D_0__Bacteria.D_1__OC31.D_2__unculturedbacterium.D_3__	2.14174			-
D_0__Bacteria.D_1__OC31.D_2__unculturedbacterium.D_3__.D_4__	2.14174			-
D_0__Bacteria.D_1__OC31.D_2__unculturedbacterium.D_3__.D_4__.D_5__	2.14174			-
D_0__Bacteria.D_1__Proteobacteria	5.94736			-
D_0__Bacteria.D_1__Proteobacteria.D_2__Alphaproteobacteria	4.55696	Media.Control	4.22273	0.0495346
D_0__Bacteria.D_1__Proteobacteria.D_2__Alphaproteobacteria.D_3__Caulobacterales	1.86463			-
D_0__Bacteria.D_1__Proteobacteria.D_2__Alphaproteobacteria.D_3__Caulobacterales.D_4__Caulobacteraceae	1.86463			-
D_0__Bacteria.D_1__Proteobacteria.D_2__Alphaproteobacteria.D_3__Caulobacterales.D_4__Caulobacteraceae.D_5__uncultured	1.86463			-
D_0__Bacteria.D_1__Proteobacteria.D_2__Alphaproteobacteria.D_3__DB1_14	2.04072			-
D_0__Bacteria.D_1__Proteobacteria.D_2__Alphaproteobacteria.D_3__DB1_14.D_4__unculturedbacterium	2.04072			-
D_0__Bacteria.D_1__Proteobacteria.D_2__Alphaproteobacteria.D_3__DB1_14.D_4__unculturedbacterium.D_5__	2.04072			-
D_0__Bacteria.D_1__Proteobacteria.D_2__Alphaproteobacteria.D_3__Rhizobiales	4.00702	Media.Control	3.71135	0.0495346
D_0__Bacteria.D_1__Proteobacteria.D_2__Alphaproteobacteria.D_3__Rhizobiales.D_4__alphaIcluster	2.49886			-
D_0__Bacteria.D_1__Proteobacteria.D_2__Alphaproteobacteria.D_3__Rhizobiales.D_4__alphaIcluster.D_5__unculturedbacterium	2.49886			-
D_0__Bacteria.D_1__Proteobacteria.D_2__Alphaproteobacteria.D_3__Rhizobiales.D_4__Bradyrhizobiaceae	3.29981	Media.Control	3.0153	0.036904
D_0__Bacteria.D_1__Proteobacteria.D_2__Alphaproteobacteria.D_3__Rhizobiales.D_4__Bradyrhizobiaceae.D_5__Bosea	3.29981	Media.Control	3.02871	0.036904
D_0__Bacteria.D_1__Proteobacteria.D_2__Alphaproteobacteria.D_3__Rhizobiales.D_4__Brucellaceae	2.82126			-
D_0__Bacteria.D_1__Proteobacteria.D_2__Alphaproteobacteria.D_3__Rhizobiales.D_4__Brucellaceae.D_5__Ochrobactrum	1.37171			-
D_0__Bacteria.D_1__Proteobacteria.D_2__Alphaproteobacteria.D_3__Rhizobiales.D_4__Brucellaceae.D_5__Pseudochrobactrum	2.80556			-
D_0__Bacteria.D_1__Proteobacteria.D_2__Alphaproteobacteria.D_3__Rhizobiales.D_4__Hyphomicrobiaceae	1.92262			-
D_0__Bacteria.D_1__Proteobacteria.D_2__Alphaproteobacteria.D_3__Rhizobiales.D_4__Hyphomicrobiaceae.D_5__Devosia	1.92262			-
D_0__Bacteria.D_1__Proteobacteria.D_2__Alphaproteobacteria.D_3__Rhizobiales.D_4__Methylobacteriaceae	2.47541	Media.Control	3.63251	0.036904
D_0__Bacteria.D_1__Proteobacteria.D_2__Alphaproteobacteria.D_3__Rhizobiales.D_4__Methylobacteriaceae.D_5__Meganema	1.5549			-
D_0__Bacteria.D_1__Proteobacteria.D_2__Alphaproteobacteria.D_3__Rhizobiales.D_4__Methylobacteriaceae.D_5__Methylobacterium	2.41985	Media.Control	3.11115	0.036904
D_0__Bacteria.D_1__Proteobacteria.D_2__Alphaproteobacteria.D_3__Rhizobiales.D_4__Phyllobacteriaceae	2.33425	Media.Control	3.03728	0.036904
D_0__Bacteria.D_1__Proteobacteria.D_2__Alphaproteobacteria.D_3__Rhizobiales.D_4__Phyllobacteriaceae.D_5__Aquamicrobium	1.39218			-
D_0__Bacteria.D_1__Proteobacteria.D_2__Alphaproteobacteria.D_3__Rhizobiales.D_4__Phyllobacteriaceae.Other	2.28155			-
D_0__Bacteria.D_1__Proteobacteria.D_2__Alphaproteobacteria.D_3__Rhizobiales.D_4__Rhizobiaceae	3.76026	Media.Control	3.48431	0.0463016
D_0__Bacteria.D_1__Proteobacteria.D_2__Alphaproteobacteria.D_3__Rhizobiales.D_4__Rhizobiaceae.D_5__Kaistia	1.02619			-
D_0__Bacteria.D_1__Proteobacteria.D_2__Alphaproteobacteria.D_3__Rhizobiales.D_4__Rhizobiaceae.D_5__Rhizobium	3.21374	Media.Control	2.96164	0.036904
D_0__Bacteria.D_1__Proteobacteria.D_2__Alphaproteobacteria.D_3__Rhizobiales.D_4__Rhizobiaceae.D_5__Shinella	1.69321			-
D_0__Bacteria.D_1__Proteobacteria.D_2__Alphaproteobacteria.D_3__Rhizobiales.D_4__Rhizobiaceae.Other	3.60988			-
D_0__Bacteria.D_1__Proteobacteria.D_2__Alphaproteobacteria.D_3__Rhizobiales.D_4__Xanthobacteraceae	2.91069			-
D_0__Bacteria.D_1__Proteobacteria.D_2__Alphaproteobacteria.D_3__Rhizobiales.D_4__Xanthobacteraceae.D_5__Labrys	2.91069			-
D_0__Bacteria.D_1__Proteobacteria.D_2__Alphaproteobacteria.D_3__Rhizobiales.Other	1.30503			-
D_0__Bacteria.D_1__Proteobacteria.D_2__Alphaproteobacteria.D_3__Rhizobiales.Other.Other	1.30503			-
D_0__Bacteria.D_1__Proteobacteria.D_2__Alphaproteobacteria.D_3__Rhodobacterales	3.52773	Media.Control	3.24396	0.0463016
D_0__Bacteria.D_1__Proteobacteria.D_2__Alphaproteobacteria.D_3__Rhodobacterales.D_4__Rhodobacteraceae	3.52773	Media.Control	3.24534	0.0463016
D_0__Bacteria.D_1__Proteobacteria.D_2__Alphaproteobacteria.D_3__Rhodobacterales.D_4__Rhodobacteraceae.D_5__Paracoccus	2.4101			-
D_0__Bacteria.D_1__Proteobacteria.D_2__Alphaproteobacteria.D_3__Rhodobacterales.D_4__Rhodobacteraceae.D_5__Rhodobacter	3.03951	Media.Control	2.83783	0.0463016
D_0__Bacteria.D_1__Proteobacteria.D_2__Alphaproteobacteria.D_3__Rhodobacterales.D_4__Rhodobacteraceae.Other	3.30501	Media.Control	3.00843	0.036904
D_0__Bacteria.D_1__Proteobacteria.D_2__Alphaproteobacteria.D_3__Rhodospirillales	3.61813	Media.Control	3.32634	0.0495346
D_0__Bacteria.D_1__Proteobacteria.D_2__Alphaproteobacteria.D_3__Rhodospirillales.D_4__Acetobacteraceae	0.850098			-
D_0__Bacteria.D_1__Proteobacteria.D_2__Alphaproteobacteria.D_3__Rhodospirillales.D_4__Acetobacteraceae.D_5__Roseomonas	0.850098			-
D_0__Bacteria.D_1__Proteobacteria.D_2__Alphaproteobacteria.D_3__Rhodospirillales.D_4__Rhodospirillaceae	3.61813	Media.Control	3.51805	0.0495346
D_0__Bacteria.D_1__Proteobacteria.D_2__Alphaproteobacteria.D_3__Rhodospirillales.D_4__Rhodospirillaceae.D_5__Dongia	1.89459			-
D_0__Bacteria.D_1__Proteobacteria.D_2__Alphaproteobacteria.D_3__Rhodospirillales.D_4__Rhodospirillaceae.D_5__Elstera	3.06985	Media.Control	2.87722	0.0463016
D_0__Bacteria.D_1__Proteobacteria.D_2__Alphaproteobacteria.D_3__Rhodospirillales.D_4__Rhodospirillaceae.D_5__Magnetospirillum	1.52688			-
D_0__Bacteria.D_1__Proteobacteria.D_2__Alphaproteobacteria.D_3__Rhodospirillales.D_4__Rhodospirillaceae.Other	3.45701			-
D_0__Bacteria.D_1__Proteobacteria.D_2__Alphaproteobacteria.D_3__Rickettsiales	4.24791	Media.Control	3.95379	0.0495346
D_0__Bacteria.D_1__Proteobacteria.D_2__Alphaproteobacteria.D_3__Rickettsiales.D_4__AKIW1012	1.92262			-
D_0__Bacteria.D_1__Proteobacteria.D_2__Alphaproteobacteria.D_3__Rickettsiales.D_4__AKIW1012.D_5__unculturedbacterium	1.92262			-
D_0__Bacteria.D_1__Proteobacteria.D_2__Alphaproteobacteria.D_3__Rickettsiales.D_4__Holosporaceae	1.4446			-
D_0__Bacteria.D_1__Proteobacteria.D_2__Alphaproteobacteria.D_3__Rickettsiales.D_4__Holosporaceae.D_5__uncultured	1.4446			-
D_0__Bacteria.D_1__Proteobacteria.D_2__Alphaproteobacteria.D_3__Rickettsiales.D_4__LWSR_14	2.35745			-
D_0__Bacteria.D_1__Proteobacteria.D_2__Alphaproteobacteria.D_3__Rickettsiales.D_4__LWSR_14.D_5__unculturedbacterium	2.35745			-
D_0__Bacteria.D_1__Proteobacteria.D_2__Alphaproteobacteria.D_3__Rickettsiales.D_4__mitochondria	1.81541			-
D_0__Bacteria.D_1__Proteobacteria.D_2__Alphaproteobacteria.D_3__Rickettsiales.D_4__mitochondria.Other	1.81541			-
D_0__Bacteria.D_1__Proteobacteria.D_2__Alphaproteobacteria.D_3__Rickettsiales.D_4__Rickettsiaceae	4.2292	Media.Control	3.88135	0.0495346
D_0__Bacteria.D_1__Proteobacteria.D_2__Alphaproteobacteria.D_3__Rickettsiales.D_4__Rickettsiaceae.D_5__Rickettsia	4.21127	Media.Control	3.89594	0.0495346
D_0__Bacteria.D_1__Proteobacteria.D_2__Alphaproteobacteria.D_3__Rickettsiales.D_4__Rickettsiaceae.D_5__uncultured	2.83612	Media.Control	2.94718	0.0463016
D_0__Bacteria.D_1__Proteobacteria.D_2__Alphaproteobacteria.D_3__Rickettsiales.D_4__RickettsialesIncertaeSedis	2.46123	Media.Control	2.92277	0.036904
D_0__Bacteria.D_1__Proteobacteria.D_2__Alphaproteobacteria.D_3__Rickettsiales.D_4__RickettsialesIncertaeSedis.D_5__CandidatusCaptivus	2.46123	Media.Control	2.89608	0.036904
D_0__Bacteria.D_1__Proteobacteria.D_2__Alphaproteobacteria.D_3__Rickettsiales.D_4__SM2D12	1.7185			-
D_0__Bacteria.D_1__Proteobacteria.D_2__Alphaproteobacteria.D_3__Rickettsiales.D_4__SM2D12.D_5__unculturedbacterium	1.7185			-
D_0__Bacteria.D_1__Proteobacteria.D_2__Alphaproteobacteria.D_3__Sphingomonadales	1.74872			-
D_0__Bacteria.D_1__Proteobacteria.D_2__Alphaproteobacteria.D_3__Sphingomonadales.D_4__Sphingomonadaceae	1.74872			-
D_0__Bacteria.D_1__Proteobacteria.D_2__Alphaproteobacteria.D_3__Sphingomonadales.D_4__Sphingomonadaceae.D_5__Sphingomonas	1.74872			-
D_0__Bacteria.D_1__Proteobacteria.D_2__Alphaproteobacteria.Other	2.63725			-
D_0__Bacteria.D_1__Proteobacteria.D_2__Alphaproteobacteria.Other.Other	2.63725			-
D_0__Bacteria.D_1__Proteobacteria.D_2__Alphaproteobacteria.Other.Other.Other	2.63725			-
D_0__Bacteria.D_1__Proteobacteria.D_2__Betaproteobacteria	5.86432	Media.Control	5.44876	0.0495346
D_0__Bacteria.D_1__Proteobacteria.D_2__Betaproteobacteria.D_3__Burkholderiales	5.50596			-
D_0__Bacteria.D_1__Proteobacteria.D_2__Betaproteobacteria.D_3__Burkholderiales.D_4__Alcaligenaceae	2.28054			-
D_0__Bacteria.D_1__Proteobacteria.D_2__Betaproteobacteria.D_3__Burkholderiales.D_4__Alcaligenaceae.D_5__Achromobacter	2.19004			-
D_0__Bacteria.D_1__Proteobacteria.D_2__Betaproteobacteria.D_3__Burkholderiales.D_4__Alcaligenaceae.D_5__uncultured	1.5549			-
D_0__Bacteria.D_1__Proteobacteria.D_2__Betaproteobacteria.D_3__Burkholderiales.D_4__Burkholderiaceae	3.61459			-
D_0__Bacteria.D_1__Proteobacteria.D_2__Betaproteobacteria.D_3__Burkholderiales.D_4__Burkholderiaceae.D_5__Chitinimonas	3.60695			-
D_0__Bacteria.D_1__Proteobacteria.D_2__Betaproteobacteria.D_3__Burkholderiales.D_4__Burkholderiaceae.D_5__Ralstonia	1.85593			-
D_0__Bacteria.D_1__Proteobacteria.D_2__Betaproteobacteria.D_3__Burkholderiales.D_4__Comamonadaceae	5.43366	Media.Control	5.03391	0.0495346
D_0__Bacteria.D_1__Proteobacteria.D_2__Betaproteobacteria.D_3__Burkholderiales.D_4__Comamonadaceae.D_5__Aquabacterium	3.11423			-
D_0__Bacteria.D_1__Proteobacteria.D_2__Betaproteobacteria.D_3__Burkholderiales.D_4__Comamonadaceae.D_5__Comamonas	4.44968	Media.HF	4.09971	0.0495346
D_0__Bacteria.D_1__Proteobacteria.D_2__Betaproteobacteria.D_3__Burkholderiales.D_4__Comamonadaceae.D_5__Delftia	3.21579			-
D_0__Bacteria.D_1__Proteobacteria.D_2__Betaproteobacteria.D_3__Burkholderiales.D_4__Comamonadaceae.D_5__Hydrogenophaga	1.5636			-
D_0__Bacteria.D_1__Proteobacteria.D_2__Betaproteobacteria.D_3__Burkholderiales.D_4__Comamonadaceae.D_5__Pelomonas	4.40519			-
D_0__Bacteria.D_1__Proteobacteria.D_2__Betaproteobacteria.D_3__Burkholderiales.D_4__Comamonadaceae.Other	5.38035	Media.Control	5.0295	0.0495346
D_0__Bacteria.D_1__Proteobacteria.D_2__Betaproteobacteria.D_3__Burkholderiales.D_4__Oxalobacteraceae	4.87885			-
D_0__Bacteria.D_1__Proteobacteria.D_2__Betaproteobacteria.D_3__Burkholderiales.D_4__Oxalobacteraceae.D_5__Massilia	4.82521	Media.HF	4.39887	0.0495346
D_0__Bacteria.D_1__Proteobacteria.D_2__Betaproteobacteria.D_3__Burkholderiales.D_4__Oxalobacteraceae.D_5__Undibacterium	4.46087			-
D_0__Bacteria.D_1__Proteobacteria.D_2__Betaproteobacteria.D_3__Neisseriales	4.21328			-
D_0__Bacteria.D_1__Proteobacteria.D_2__Betaproteobacteria.D_3__Neisseriales.D_4__Neisseriaceae	4.21328			-
D_0__Bacteria.D_1__Proteobacteria.D_2__Betaproteobacteria.D_3__Neisseriales.D_4__Neisseriaceae.D_5__Leeia	4.15692	Media.Control	3.85666	0.0495346
D_0__Bacteria.D_1__Proteobacteria.D_2__Betaproteobacteria.D_3__Neisseriales.D_4__Neisseriaceae.D_5__uncultured	1.35078			-
D_0__Bacteria.D_1__Proteobacteria.D_2__Betaproteobacteria.D_3__Neisseriales.D_4__Neisseriaceae.D_5__Vogesella	3.7601	Media.HF	3.53626	0.0495346
D_0__Bacteria.D_1__Proteobacteria.D_2__Betaproteobacteria.D_3__Rhodocyclales	5.59525	Media.Control	5.27687	0.0495346
D_0__Bacteria.D_1__Proteobacteria.D_2__Betaproteobacteria.D_3__Rhodocyclales.D_4__Rhodocyclaceae	5.59525	Media.Control	5.26973	0.0495346
D_0__Bacteria.D_1__Proteobacteria.D_2__Betaproteobacteria.D_3__Rhodocyclales.D_4__Rhodocyclaceae.D_5__Dechloromonas	2.86877	Media.Control	3.14858	0.0495346
D_0__Bacteria.D_1__Proteobacteria.D_2__Betaproteobacteria.D_3__Rhodocyclales.D_4__Rhodocyclaceae.D_5__Methyloversatilis	4.49209	Media.Control	4.21115	0.0495346
D_0__Bacteria.D_1__Proteobacteria.D_2__Betaproteobacteria.D_3__Rhodocyclales.D_4__Rhodocyclaceae.D_5__Zoogloea	5.55869	Media.Control	5.25538	0.0495346
D_0__Bacteria.D_1__Proteobacteria.D_2__Betaproteobacteria.Other	3.21638			-
D_0__Bacteria.D_1__Proteobacteria.D_2__Betaproteobacteria.Other.Other	3.21638			-
D_0__Bacteria.D_1__Proteobacteria.D_2__Betaproteobacteria.Other.Other.Other	3.21638			-
D_0__Bacteria.D_1__Proteobacteria.D_2__Deltaproteobacteria	4.40468	Media.Control	4.11746	0.0495346
D_0__Bacteria.D_1__Proteobacteria.D_2__Deltaproteobacteria.D_3__Bdellovibrionales	4.31063	Media.Control	4.03058	0.0495346
D_0__Bacteria.D_1__Proteobacteria.D_2__Deltaproteobacteria.D_3__Bdellovibrionales.D_4__Bacteriovoracaceae	3.36413	Media.Control	3.10029	0.0463016
D_0__Bacteria.D_1__Proteobacteria.D_2__Deltaproteobacteria.D_3__Bdellovibrionales.D_4__Bacteriovoracaceae.D_5__Bacteriovorax	3.36413	Media.Control	3.0713	0.0463016
D_0__Bacteria.D_1__Proteobacteria.D_2__Deltaproteobacteria.D_3__Bdellovibrionales.D_4__Bdellovibrionaceae	4.2585	Media.Control	3.95968	0.0495346
D_0__Bacteria.D_1__Proteobacteria.D_2__Deltaproteobacteria.D_3__Bdellovibrionales.D_4__Bdellovibrionaceae.D_5__Bdellovibrio	4.2585	Media.Control	4.0238	0.0495346
D_0__Bacteria.D_1__Proteobacteria.D_2__Deltaproteobacteria.D_3__Myxococcales	3.69408	Media.Control	3.41402	0.0495346
D_0__Bacteria.D_1__Proteobacteria.D_2__Deltaproteobacteria.D_3__Myxococcales.D_4__0319_6G20	2.40309			-
D_0__Bacteria.D_1__Proteobacteria.D_2__Deltaproteobacteria.D_3__Myxococcales.D_4__0319_6G20.D_5__unculturedbacterium	2.40309			-
D_0__Bacteria.D_1__Proteobacteria.D_2__Deltaproteobacteria.D_3__Myxococcales.D_4__mle1_27	3.18259			-
D_0__Bacteria.D_1__Proteobacteria.D_2__Deltaproteobacteria.D_3__Myxococcales.D_4__mle1_27.D_5__unculturedbacterium	3.18259			-
D_0__Bacteria.D_1__Proteobacteria.D_2__Deltaproteobacteria.D_3__Myxococcales.D_4__Polyangiaceae	3.50084	Media.Control	3.22293	0.0463016
D_0__Bacteria.D_1__Proteobacteria.D_2__Deltaproteobacteria.D_3__Myxococcales.D_4__Polyangiaceae.D_5__Sorangium	3.50084	Media.Control	3.22214	0.0463016
D_0__Bacteria.D_1__Proteobacteria.D_2__Gammaproteobacteria	5.84453	Media.HF	5.48538	0.0495346
D_0__Bacteria.D_1__Proteobacteria.D_2__Gammaproteobacteria.D_3__Aeromonadales	5.13584	Media.HF	4.80825	0.0495346
D_0__Bacteria.D_1__Proteobacteria.D_2__Gammaproteobacteria.D_3__Aeromonadales.D_4__Aeromonadaceae	5.13584	Media.HF	4.80673	0.0495346
D_0__Bacteria.D_1__Proteobacteria.D_2__Gammaproteobacteria.D_3__Aeromonadales.D_4__Aeromonadaceae.D_5__Aeromonas	5.13584	Media.HF	4.78326	0.0495346
D_0__Bacteria.D_1__Proteobacteria.D_2__Gammaproteobacteria.D_3__Alteromonadales	3.43851	Media.HF	3.26906	0.0495346
D_0__Bacteria.D_1__Proteobacteria.D_2__Gammaproteobacteria.D_3__Alteromonadales.D_4__Shewanellaceae	3.43851	Media.HF	3.2669	0.0495346
D_0__Bacteria.D_1__Proteobacteria.D_2__Gammaproteobacteria.D_3__Alteromonadales.D_4__Shewanellaceae.D_5__Shewanella	3.43851	Media.HF	3.27079	0.0495346
D_0__Bacteria.D_1__Proteobacteria.D_2__Gammaproteobacteria.D_3__Enterobacteriales	3.60594			-
D_0__Bacteria.D_1__Proteobacteria.D_2__Gammaproteobacteria.D_3__Enterobacteriales.D_4__Enterobacteriaceae	3.60594			-
D_0__Bacteria.D_1__Proteobacteria.D_2__Gammaproteobacteria.D_3__Enterobacteriales.D_4__Enterobacteriaceae.D_5__Escherichia_Shigella	1.96591			-
D_0__Bacteria.D_1__Proteobacteria.D_2__Gammaproteobacteria.D_3__Enterobacteriales.D_4__Enterobacteriaceae.D_5__Plesiomonas	2.88118			-
D_0__Bacteria.D_1__Proteobacteria.D_2__Gammaproteobacteria.D_3__Enterobacteriales.D_4__Enterobacteriaceae.Other	3.51525	Media.HF	3.37579	0.036904
D_0__Bacteria.D_1__Proteobacteria.D_2__Gammaproteobacteria.D_3__Legionellales	3.54171	Media.Control	3.23227	0.0495346
D_0__Bacteria.D_1__Proteobacteria.D_2__Gammaproteobacteria.D_3__Legionellales.D_4__Coxiellaceae	3.43819	Media.Control	3.54132	0.0495346
D_0__Bacteria.D_1__Proteobacteria.D_2__Gammaproteobacteria.D_3__Legionellales.D_4__Coxiellaceae.D_5__Aquicella	3.42518	Media.Control	3.17454	0.0495346
D_0__Bacteria.D_1__Proteobacteria.D_2__Gammaproteobacteria.D_3__Legionellales.D_4__Coxiellaceae.D_5__Coxiella	1.90836			-
D_0__Bacteria.D_1__Proteobacteria.D_2__Gammaproteobacteria.D_3__Legionellales.D_4__Legionellaceae	2.86821			-
D_0__Bacteria.D_1__Proteobacteria.D_2__Gammaproteobacteria.D_3__Legionellales.D_4__Legionellaceae.D_5__Legionella	2.86821			-
D_0__Bacteria.D_1__Proteobacteria.D_2__Gammaproteobacteria.D_3__NKB5	3.04733	Media.Control	3.57581	0.0495346
D_0__Bacteria.D_1__Proteobacteria.D_2__Gammaproteobacteria.D_3__NKB5.D_4__unculturedbacterium	3.04733	Media.Control	3.54877	0.0495346
D_0__Bacteria.D_1__Proteobacteria.D_2__Gammaproteobacteria.D_3__NKB5.D_4__unculturedbacterium.D_5__	3.04733	Media.Control	3.71205	0.0495346
D_0__Bacteria.D_1__Proteobacteria.D_2__Gammaproteobacteria.D_3__Oceanospirillales	1.88226			-
D_0__Bacteria.D_1__Proteobacteria.D_2__Gammaproteobacteria.D_3__Oceanospirillales.D_4__Halomonadaceae	1.88226			-
D_0__Bacteria.D_1__Proteobacteria.D_2__Gammaproteobacteria.D_3__Oceanospirillales.D_4__Halomonadaceae.D_5__Halomonas	1.88226			-
D_0__Bacteria.D_1__Proteobacteria.D_2__Gammaproteobacteria.D_3__Pseudomonadales	5.71243	Media.HF	5.39323	0.0495346
D_0__Bacteria.D_1__Proteobacteria.D_2__Gammaproteobacteria.D_3__Pseudomonadales.D_4__Moraxellaceae	5.49327	Media.HF	5.13897	0.0495346
D_0__Bacteria.D_1__Proteobacteria.D_2__Gammaproteobacteria.D_3__Pseudomonadales.D_4__Moraxellaceae.D_5__Acinetobacter	5.49327	Media.HF	5.13077	0.0495346
D_0__Bacteria.D_1__Proteobacteria.D_2__Gammaproteobacteria.D_3__Pseudomonadales.D_4__Moraxellaceae.D_5__Perlucidibaca	2.77846	Media.Control	2.76659	0.036904
D_0__Bacteria.D_1__Proteobacteria.D_2__Gammaproteobacteria.D_3__Pseudomonadales.D_4__Pseudomonadaceae	5.31042	Media.HF	4.999	0.0495346
D_0__Bacteria.D_1__Proteobacteria.D_2__Gammaproteobacteria.D_3__Pseudomonadales.D_4__Pseudomonadaceae.D_5__Pseudomonas	5.31042	Media.HF	5.02483	0.0495346
D_0__Bacteria.D_1__Proteobacteria.D_2__Gammaproteobacteria.D_3__Vibrionales	4.27019			-
D_0__Bacteria.D_1__Proteobacteria.D_2__Gammaproteobacteria.D_3__Vibrionales.D_4__Vibrionaceae	4.27019			-
D_0__Bacteria.D_1__Proteobacteria.D_2__Gammaproteobacteria.D_3__Vibrionales.D_4__Vibrionaceae.D_5__Vibrio	4.27019			-
D_0__Bacteria.D_1__Proteobacteria.D_2__Gammaproteobacteria.D_3__Xanthomonadales	4.32295			-
D_0__Bacteria.D_1__Proteobacteria.D_2__Gammaproteobacteria.D_3__Xanthomonadales.D_4__Xanthomonadaceae	4.32295			-
D_0__Bacteria.D_1__Proteobacteria.D_2__Gammaproteobacteria.D_3__Xanthomonadales.D_4__Xanthomonadaceae.D_5__Pseudoxanthomonas	1.39218			-
D_0__Bacteria.D_1__Proteobacteria.D_2__Gammaproteobacteria.D_3__Xanthomonadales.D_4__Xanthomonadaceae.D_5__Stenotrophomonas	4.32295			-
D_0__Bacteria.D_1__Proteobacteria.D_2__Gammaproteobacteria.D_3__Xanthomonadales.D_4__Xanthomonadaceae.D_5__Tahibacter	3.17008	Media.Control	2.93816	0.036904
D_0__Bacteria.D_1__Proteobacteria.D_2__Gammaproteobacteria.Other	0.796918			-
D_0__Bacteria.D_1__Proteobacteria.D_2__Gammaproteobacteria.Other.Other	0.796918			-
D_0__Bacteria.D_1__Proteobacteria.D_2__Gammaproteobacteria.Other.Other.Other	0.796918			-
D_0__Bacteria.D_1__Spirochaetae	2.004			-
D_0__Bacteria.D_1__Spirochaetae.D_2__Spirochaetes	2.004			-
D_0__Bacteria.D_1__Spirochaetae.D_2__Spirochaetes.D_3__Spirochaetales	2.004			-
D_0__Bacteria.D_1__Spirochaetae.D_2__Spirochaetes.D_3__Spirochaetales.D_4__Leptospiraceae	2.004			-
D_0__Bacteria.D_1__Spirochaetae.D_2__Spirochaetes.D_3__Spirochaetales.D_4__Leptospiraceae.D_5__Turneriella	2.004			-
D_0__Bacteria.D_1__TM6	1.96154			-
D_0__Bacteria.D_1__TM6.D_2__unculturedbacterium	1.96154			-
D_0__Bacteria.D_1__TM6.D_2__unculturedbacterium.D_3__	1.96154			-
D_0__Bacteria.D_1__TM6.D_2__unculturedbacterium.D_3__.D_4__	1.96154			-
D_0__Bacteria.D_1__TM6.D_2__unculturedbacterium.D_3__.D_4__.D_5__	1.96154			-
D_0__Bacteria.Other	3.8487	Media.Control	3.53429	0.0495346
D_0__Bacteria.Other.Other	3.8487	Media.Control	3.54437	0.0495346
D_0__Bacteria.Other.Other.Other	3.8487	Media.Control	3.55198	0.0495346
D_0__Bacteria.Other.Other.Other.Other	3.8487	Media.Control	3.55708	0.0495346
D_0__Bacteria.Other.Other.Other.Other.Other	3.8487	Media.Control	3.56087	0.0495346
