# Supplementary material for: High fat diet induces microbiota-dependent silencing of enteroendocrine cells
Source: eLife. 2019 Dec 3;8:e48479. doi: 10.7554/eLife.48479 (PMC6937151; doi:10.7554/eLife.48479)
Supplement: Supplementary file 4. [file elife-48479-supp4.xlsx]

## Sheet: LEfSe gut
LEfSe analysis of 16S rRNA gene sequences from high-fat fed and control zebrafish guts
Feature	highest class average	condition	LDA effect size	p-value
D_0__Bacteria	5.99999			-
D_0__Bacteria.D_1__Acidobacteria	1.22055			-
D_0__Bacteria.D_1__Acidobacteria.D_2__Acidobacteria	1.22055			-
D_0__Bacteria.D_1__Acidobacteria.D_2__Acidobacteria.D_3__Acidobacteriales	1.22055			-
D_0__Bacteria.D_1__Acidobacteria.D_2__Acidobacteria.D_3__Acidobacteriales.D_4__Acidobacteriaceae_Subgroup1_	1.22055			-
D_0__Bacteria.D_1__Acidobacteria.D_2__Acidobacteria.D_3__Acidobacteriales.D_4__Acidobacteriaceae_Subgroup1_.D_5__Terriglobus	1.22055			-
D_0__Bacteria.D_1__Actinobacteria	3.29296			-
D_0__Bacteria.D_1__Actinobacteria.D_2__Acidimicrobiia	0.566723			-
D_0__Bacteria.D_1__Actinobacteria.D_2__Acidimicrobiia.D_3__Acidimicrobiales	0.566723			-
D_0__Bacteria.D_1__Actinobacteria.D_2__Acidimicrobiia.D_3__Acidimicrobiales.D_4__Iamiaceae	0.235646			-
D_0__Bacteria.D_1__Actinobacteria.D_2__Acidimicrobiia.D_3__Acidimicrobiales.D_4__Iamiaceae.D_5__Iamia	0.235646			-
D_0__Bacteria.D_1__Actinobacteria.D_2__Acidimicrobiia.D_3__Acidimicrobiales.D_4__uncultured	0.566723			-
D_0__Bacteria.D_1__Actinobacteria.D_2__Acidimicrobiia.D_3__Acidimicrobiales.D_4__uncultured.D_5__unculturedbacterium	0.566723			-
D_0__Bacteria.D_1__Actinobacteria.D_2__Actinobacteria	3.29214			-
D_0__Bacteria.D_1__Actinobacteria.D_2__Actinobacteria.D_3__Actinomycetales	0.867604			-
D_0__Bacteria.D_1__Actinobacteria.D_2__Actinobacteria.D_3__Actinomycetales.D_4__Actinomycetaceae	0.867604			-
D_0__Bacteria.D_1__Actinobacteria.D_2__Actinobacteria.D_3__Actinomycetales.D_4__Actinomycetaceae.D_5__Actinomyces	0.867604			-
D_0__Bacteria.D_1__Actinobacteria.D_2__Actinobacteria.D_3__Bifidobacteriales	2.07472			-
D_0__Bacteria.D_1__Actinobacteria.D_2__Actinobacteria.D_3__Bifidobacteriales.D_4__Bifidobacteriaceae	2.07472			-
D_0__Bacteria.D_1__Actinobacteria.D_2__Actinobacteria.D_3__Bifidobacteriales.D_4__Bifidobacteriaceae.D_5__Bifidobacterium	2.07472			-
D_0__Bacteria.D_1__Actinobacteria.D_2__Actinobacteria.D_3__Corynebacteriales	3.00796			-
D_0__Bacteria.D_1__Actinobacteria.D_2__Actinobacteria.D_3__Corynebacteriales.D_4__Corynebacteriaceae	3.00638			-
D_0__Bacteria.D_1__Actinobacteria.D_2__Actinobacteria.D_3__Corynebacteriales.D_4__Corynebacteriaceae.D_5__Corynebacterium	2.86025			-
D_0__Bacteria.D_1__Actinobacteria.D_2__Actinobacteria.D_3__Corynebacteriales.D_4__Corynebacteriaceae.D_5__uncultured	2.46231			-
D_0__Bacteria.D_1__Actinobacteria.D_2__Actinobacteria.D_3__Corynebacteriales.D_4__Mycobacteriaceae	0.566723			-
D_0__Bacteria.D_1__Actinobacteria.D_2__Actinobacteria.D_3__Corynebacteriales.D_4__Mycobacteriaceae.D_5__Mycobacterium	0.566723			-
D_0__Bacteria.D_1__Actinobacteria.D_2__Actinobacteria.D_3__Micrococcales	2.92706			-
D_0__Bacteria.D_1__Actinobacteria.D_2__Actinobacteria.D_3__Micrococcales.D_4__Bogoriellaceae	1.94138			-
D_0__Bacteria.D_1__Actinobacteria.D_2__Actinobacteria.D_3__Micrococcales.D_4__Bogoriellaceae.D_5__Georgenia	1.94138			-
D_0__Bacteria.D_1__Actinobacteria.D_2__Actinobacteria.D_3__Micrococcales.D_4__Intrasporangiaceae	2.24051			-
D_0__Bacteria.D_1__Actinobacteria.D_2__Actinobacteria.D_3__Micrococcales.D_4__Intrasporangiaceae.Other	2.24051			-
D_0__Bacteria.D_1__Actinobacteria.D_2__Actinobacteria.D_3__Micrococcales.D_4__Microbacteriaceae	2.35764			-
D_0__Bacteria.D_1__Actinobacteria.D_2__Actinobacteria.D_3__Micrococcales.D_4__Microbacteriaceae.D_5__Agromyces	1.67956			-
D_0__Bacteria.D_1__Actinobacteria.D_2__Actinobacteria.D_3__Micrococcales.D_4__Microbacteriaceae.D_5__Leucobacter	1.76777			-
D_0__Bacteria.D_1__Actinobacteria.D_2__Actinobacteria.D_3__Micrococcales.D_4__Microbacteriaceae.D_5__Lysinimonas	2.17765			-
D_0__Bacteria.D_1__Actinobacteria.D_2__Actinobacteria.D_3__Micrococcales.D_4__Micrococcaceae	2.78734			-
D_0__Bacteria.D_1__Actinobacteria.D_2__Actinobacteria.D_3__Micrococcales.D_4__Micrococcaceae.D_5__Kocuria	2.78734			-
D_0__Bacteria.D_1__Actinobacteria.D_2__Actinobacteria.D_3__Micrococcales.D_4__Micrococcaceae.D_5__Micrococcus	1.91167			-
D_0__Bacteria.D_1__Actinobacteria.D_2__Actinobacteria.D_3__Propionibacteriales	1.84689			-
D_0__Bacteria.D_1__Actinobacteria.D_2__Actinobacteria.D_3__Propionibacteriales.D_4__Propionibacteriaceae	1.84689			-
D_0__Bacteria.D_1__Actinobacteria.D_2__Actinobacteria.D_3__Propionibacteriales.D_4__Propionibacteriaceae.D_5__Propionibacterium	1.84689			-
D_0__Bacteria.D_1__Actinobacteria.D_2__Actinobacteria.D_3__Pseudonocardiales	1.40307			-
D_0__Bacteria.D_1__Actinobacteria.D_2__Actinobacteria.D_3__Pseudonocardiales.D_4__Pseudonocardiaceae	1.40307			-
D_0__Bacteria.D_1__Actinobacteria.D_2__Actinobacteria.D_3__Pseudonocardiales.D_4__Pseudonocardiaceae.D_5__Saccharopolyspora	1.40307			-
D_0__Bacteria.D_1__Armatimonadetes	0.235646			-
D_0__Bacteria.D_1__Armatimonadetes.D_2__unculturedbacterium	0.235646			-
D_0__Bacteria.D_1__Armatimonadetes.D_2__unculturedbacterium.D_3__	0.235646			-
D_0__Bacteria.D_1__Armatimonadetes.D_2__unculturedbacterium.D_3__.D_4__	0.235646			-
D_0__Bacteria.D_1__Armatimonadetes.D_2__unculturedbacterium.D_3__.D_4__.D_5__	0.235646			-
D_0__Bacteria.D_1__Bacteroidetes	4.33842	Gut.HF	3.9968	0.0338949
D_0__Bacteria.D_1__Bacteroidetes.D_2__Bacteroidia	2.63084			-
D_0__Bacteria.D_1__Bacteroidetes.D_2__Bacteroidia.D_3__Bacteroidales	2.63084			-
D_0__Bacteria.D_1__Bacteroidetes.D_2__Bacteroidia.D_3__Bacteroidales.D_4__Bacteroidaceae	2.10517			-
D_0__Bacteria.D_1__Bacteroidetes.D_2__Bacteroidia.D_3__Bacteroidales.D_4__Bacteroidaceae.D_5__Bacteroides	2.10517			-
D_0__Bacteria.D_1__Bacteroidetes.D_2__Bacteroidia.D_3__Bacteroidales.D_4__Porphyromonadaceae	1.50702			-
D_0__Bacteria.D_1__Bacteroidetes.D_2__Bacteroidia.D_3__Bacteroidales.D_4__Porphyromonadaceae.D_5__Proteiniphilum	1.50702			-
D_0__Bacteria.D_1__Bacteroidetes.D_2__Bacteroidia.D_3__Bacteroidales.D_4__Porphyromonadaceae.D_5__uncultured	0.753846			-
D_0__Bacteria.D_1__Bacteroidetes.D_2__Bacteroidia.D_3__Bacteroidales.D_4__Prevotellaceae	1.73404			-
D_0__Bacteria.D_1__Bacteroidetes.D_2__Bacteroidia.D_3__Bacteroidales.D_4__Prevotellaceae.D_5__Alloprevotella	1.73404			-
D_0__Bacteria.D_1__Bacteroidetes.D_2__Bacteroidia.D_3__Bacteroidales.D_4__S24_7	2.46884			-
D_0__Bacteria.D_1__Bacteroidetes.D_2__Bacteroidia.D_3__Bacteroidales.D_4__S24_7.D_5__unculturedbacterium	2.46884			-
D_0__Bacteria.D_1__Bacteroidetes.D_2__Cytophagia	4.32462	Gut.HF	4.00903	0.0183178
D_0__Bacteria.D_1__Bacteroidetes.D_2__Cytophagia.D_3__Cytophagales	4.32462	Gut.HF	4.00903	0.0183178
D_0__Bacteria.D_1__Bacteroidetes.D_2__Cytophagia.D_3__Cytophagales.D_4__Cytophagaceae	4.32462	Gut.HF	4.00903	0.0183178
D_0__Bacteria.D_1__Bacteroidetes.D_2__Cytophagia.D_3__Cytophagales.D_4__Cytophagaceae.D_5__Emticicia	2.51136			-
D_0__Bacteria.D_1__Bacteroidetes.D_2__Cytophagia.D_3__Cytophagales.D_4__Cytophagaceae.D_5__Flectobacillus	4.317	Gut.HF	4.0121	0.0039726
D_0__Bacteria.D_1__Bacteroidetes.D_2__Cytophagia.D_3__Cytophagales.D_4__Cytophagaceae.D_5__uncultured	1.97211			-
D_0__Bacteria.D_1__Bacteroidetes.D_2__Cytophagia.D_3__Cytophagales.D_4__Cytophagaceae.Other	0.959862			-
D_0__Bacteria.D_1__Bacteroidetes.D_2__Flavobacteriia	1.79435			-
D_0__Bacteria.D_1__Bacteroidetes.D_2__Flavobacteriia.D_3__Flavobacteriales	1.79435			-
D_0__Bacteria.D_1__Bacteroidetes.D_2__Flavobacteriia.D_3__Flavobacteriales.D_4__Cryomorphaceae	1.6886			-
D_0__Bacteria.D_1__Bacteroidetes.D_2__Flavobacteriia.D_3__Flavobacteriales.D_4__Cryomorphaceae.D_5__Fluviicola	1.67528			-
D_0__Bacteria.D_1__Bacteroidetes.D_2__Flavobacteriia.D_3__Flavobacteriales.D_4__Cryomorphaceae.Other	0.168634			-
D_0__Bacteria.D_1__Bacteroidetes.D_2__Flavobacteriia.D_3__Flavobacteriales.D_4__Flavobacteriaceae	1.22967			-
D_0__Bacteria.D_1__Bacteroidetes.D_2__Flavobacteriia.D_3__Flavobacteriales.D_4__Flavobacteriaceae.D_5__Chryseobacterium	1.00963			-
D_0__Bacteria.D_1__Bacteroidetes.D_2__Flavobacteriia.D_3__Flavobacteriales.D_4__Flavobacteriaceae.D_5__Cloacibacterium	0.626757			-
D_0__Bacteria.D_1__Bacteroidetes.D_2__Flavobacteriia.D_3__Flavobacteriales.D_4__Flavobacteriaceae.D_5__Elizabethkingia	0.51002			-
D_0__Bacteria.D_1__Bacteroidetes.D_2__Flavobacteriia.D_3__Flavobacteriales.D_4__Flavobacteriaceae.D_5__Flavobacterium	1.10501			-
D_0__Bacteria.D_1__Bacteroidetes.D_2__Sphingobacteriia	2.90237			-
D_0__Bacteria.D_1__Bacteroidetes.D_2__Sphingobacteriia.D_3__Sphingobacteriales	2.90237			-
D_0__Bacteria.D_1__Bacteroidetes.D_2__Sphingobacteriia.D_3__Sphingobacteriales.D_4__Chitinophagaceae	2.65279			-
D_0__Bacteria.D_1__Bacteroidetes.D_2__Sphingobacteriia.D_3__Sphingobacteriales.D_4__Chitinophagaceae.D_5__Chitinophaga	1.87393			-
D_0__Bacteria.D_1__Bacteroidetes.D_2__Sphingobacteriia.D_3__Sphingobacteriales.D_4__Chitinophagaceae.D_5__Ferruginibacter	0.645755			-
D_0__Bacteria.D_1__Bacteroidetes.D_2__Sphingobacteriia.D_3__Sphingobacteriales.D_4__Chitinophagaceae.D_5__Flavihumibacter	2.37846			-
D_0__Bacteria.D_1__Bacteroidetes.D_2__Sphingobacteriia.D_3__Sphingobacteriales.D_4__Chitinophagaceae.D_5__Sediminibacterium	0.742286			-
D_0__Bacteria.D_1__Bacteroidetes.D_2__Sphingobacteriia.D_3__Sphingobacteriales.D_4__Chitinophagaceae.D_5__Taibaiella	0.235646			-
D_0__Bacteria.D_1__Bacteroidetes.D_2__Sphingobacteriia.D_3__Sphingobacteriales.D_4__Chitinophagaceae.D_5__uncultured	2.13264			-
D_0__Bacteria.D_1__Bacteroidetes.D_2__Sphingobacteriia.D_3__Sphingobacteriales.D_4__env_OPS17	1.43784			-
D_0__Bacteria.D_1__Bacteroidetes.D_2__Sphingobacteriia.D_3__Sphingobacteriales.D_4__env_OPS17.D_5__unculturedbacterium	1.43784			-
D_0__Bacteria.D_1__Bacteroidetes.D_2__Sphingobacteriia.D_3__Sphingobacteriales.D_4__Saprospiraceae	1.87738	Gut.HF	2.8914	0.0353047
D_0__Bacteria.D_1__Bacteroidetes.D_2__Sphingobacteriia.D_3__Sphingobacteriales.D_4__Saprospiraceae.D_5__uncultured	1.83925			-
D_0__Bacteria.D_1__Bacteroidetes.D_2__Sphingobacteriia.D_3__Sphingobacteriales.D_4__Saprospiraceae.Other	0.802025			-
D_0__Bacteria.D_1__Bacteroidetes.D_2__Sphingobacteriia.D_3__Sphingobacteriales.D_4__Sphingobacteriaceae	2.50746			-
D_0__Bacteria.D_1__Bacteroidetes.D_2__Sphingobacteriia.D_3__Sphingobacteriales.D_4__Sphingobacteriaceae.D_5__Sphingobacterium	2.50203			-
D_0__Bacteria.D_1__Bacteroidetes.D_2__Sphingobacteriia.D_3__Sphingobacteriales.D_4__Sphingobacteriaceae.Other	0.601442			-
D_0__Bacteria.D_1__Bacteroidetes.Other	1.40358			-
D_0__Bacteria.D_1__Bacteroidetes.Other.Other	1.40358			-
D_0__Bacteria.D_1__Bacteroidetes.Other.Other.Other	1.40358			-
D_0__Bacteria.D_1__Bacteroidetes.Other.Other.Other.Other	1.40358			-
D_0__Bacteria.D_1__Chlamydiae	2.53292			-
D_0__Bacteria.D_1__Chlamydiae.D_2__Chlamydiae	2.53292			-
D_0__Bacteria.D_1__Chlamydiae.D_2__Chlamydiae.D_3__Chlamydiales	2.53292			-
D_0__Bacteria.D_1__Chlamydiae.D_2__Chlamydiae.D_3__Chlamydiales.D_4__cvE6	0.299728			-
D_0__Bacteria.D_1__Chlamydiae.D_2__Chlamydiae.D_3__Chlamydiales.D_4__cvE6.D_5__unculturedbacterium	0.299728			-
D_0__Bacteria.D_1__Chlamydiae.D_2__Chlamydiae.D_3__Chlamydiales.D_4__Simkaniaceae	2.53292			-
D_0__Bacteria.D_1__Chlamydiae.D_2__Chlamydiae.D_3__Chlamydiales.D_4__Simkaniaceae.D_5__CandidatusRhabdochlamydia	2.53292			-
D_0__Bacteria.D_1__Chlamydiae.D_2__Chlamydiae.D_3__Chlamydiales.D_4__Simkaniaceae.D_5__uncultured	0.186682			-
D_0__Bacteria.D_1__Chlorobi	1.08474			-
D_0__Bacteria.D_1__Chlorobi.D_2__Chlorobia	1.08474			-
D_0__Bacteria.D_1__Chlorobi.D_2__Chlorobia.D_3__Chlorobiales	1.08474			-
D_0__Bacteria.D_1__Chlorobi.D_2__Chlorobia.D_3__Chlorobiales.D_4__OPB56	1.08474			-
D_0__Bacteria.D_1__Chlorobi.D_2__Chlorobia.D_3__Chlorobiales.D_4__OPB56.D_5__unculturedbacterium	0.997516			-
D_0__Bacteria.D_1__Chlorobi.D_2__Chlorobia.D_3__Chlorobiales.D_4__OPB56.Other	0.344725			-
D_0__Bacteria.D_1__Chloroflexi	1.63054			-
D_0__Bacteria.D_1__Chloroflexi.D_2__Ktedonobacteria	1.63054			-
D_0__Bacteria.D_1__Chloroflexi.D_2__Ktedonobacteria.D_3__C0119	1.63054			-
D_0__Bacteria.D_1__Chloroflexi.D_2__Ktedonobacteria.D_3__C0119.D_4__unculturedbacterium	1.63054			-
D_0__Bacteria.D_1__Chloroflexi.D_2__Ktedonobacteria.D_3__C0119.D_4__unculturedbacterium.D_5__	1.63054			-
D_0__Bacteria.D_1__CKC4	2.4082	Gut.Control	2.43699	0.00945791
D_0__Bacteria.D_1__CKC4.D_2__unculturedbacterium	2.4082	Gut.Control	2.43699	0.00945791
D_0__Bacteria.D_1__CKC4.D_2__unculturedbacterium.D_3__	2.4082	Gut.Control	2.43699	0.00945791
D_0__Bacteria.D_1__CKC4.D_2__unculturedbacterium.D_3__.D_4__	2.4082	Gut.Control	2.43699	0.00945791
D_0__Bacteria.D_1__CKC4.D_2__unculturedbacterium.D_3__.D_4__.D_5__	2.4082	Gut.Control	2.43699	0.00945791
D_0__Bacteria.D_1__Cyanobacteria	1.99927			-
D_0__Bacteria.D_1__Cyanobacteria.D_2__Chloroplast	1.92556			-
D_0__Bacteria.D_1__Cyanobacteria.D_2__Chloroplast.D_3__Nicotianatomentosiformis	1.92556			-
D_0__Bacteria.D_1__Cyanobacteria.D_2__Chloroplast.D_3__Nicotianatomentosiformis.D_4__	1.92556			-
D_0__Bacteria.D_1__Cyanobacteria.D_2__Chloroplast.D_3__Nicotianatomentosiformis.D_4__.D_5__	1.92556			-
D_0__Bacteria.D_1__Cyanobacteria.D_2__Chloroplast.Other	1.79309			-
D_0__Bacteria.D_1__Cyanobacteria.D_2__Chloroplast.Other.Other	1.79309			-
D_0__Bacteria.D_1__Cyanobacteria.D_2__Chloroplast.Other.Other.Other	1.79309			-
D_0__Bacteria.D_1__Cyanobacteria.D_2__Melainabacteria	1.19267			-
D_0__Bacteria.D_1__Cyanobacteria.D_2__Melainabacteria.D_3__Obscuribacterales	1.19267			-
D_0__Bacteria.D_1__Cyanobacteria.D_2__Melainabacteria.D_3__Obscuribacterales.D_4__unculturedbacterium	1.19267			-
D_0__Bacteria.D_1__Cyanobacteria.D_2__Melainabacteria.D_3__Obscuribacterales.D_4__unculturedbacterium.D_5__	1.19267			-
D_0__Bacteria.D_1__Deinococcus_Thermus	1.6931			-
D_0__Bacteria.D_1__Deinococcus_Thermus.D_2__Deinococci	1.6931			-
D_0__Bacteria.D_1__Deinococcus_Thermus.D_2__Deinococci.D_3__Deinococcales	1.31812			-
D_0__Bacteria.D_1__Deinococcus_Thermus.D_2__Deinococci.D_3__Deinococcales.D_4__Deinococcaceae	1.31812			-
D_0__Bacteria.D_1__Deinococcus_Thermus.D_2__Deinococci.D_3__Deinococcales.D_4__Deinococcaceae.D_5__Deinococcus	1.31812			-
D_0__Bacteria.D_1__Deinococcus_Thermus.D_2__Deinococci.D_3__Thermales	1.6931			-
D_0__Bacteria.D_1__Deinococcus_Thermus.D_2__Deinococci.D_3__Thermales.D_4__Thermaceae	1.6931			-
D_0__Bacteria.D_1__Deinococcus_Thermus.D_2__Deinococci.D_3__Thermales.D_4__Thermaceae.D_5__Meiothermus	1.41275			-
D_0__Bacteria.D_1__Deinococcus_Thermus.D_2__Deinococci.D_3__Thermales.D_4__Thermaceae.D_5__Thermus	1.37036			-
D_0__Bacteria.D_1__Firmicutes	3.7915			-
D_0__Bacteria.D_1__Firmicutes.D_2__Bacilli	3.74951			-
D_0__Bacteria.D_1__Firmicutes.D_2__Bacilli.D_3__Bacillales	3.63741			-
D_0__Bacteria.D_1__Firmicutes.D_2__Bacilli.D_3__Bacillales.D_4__Bacillaceae	3.52717	Gut.HF	3.32707	0.0353047
D_0__Bacteria.D_1__Firmicutes.D_2__Bacilli.D_3__Bacillales.D_4__Bacillaceae.D_5__Anoxybacillus	3.03974			-
D_0__Bacteria.D_1__Firmicutes.D_2__Bacilli.D_3__Bacillales.D_4__Bacillaceae.D_5__Bacillus	2.51065			-
D_0__Bacteria.D_1__Firmicutes.D_2__Bacilli.D_3__Bacillales.D_4__Bacillaceae.D_5__Caldibacillus	1.47928			-
D_0__Bacteria.D_1__Firmicutes.D_2__Bacilli.D_3__Bacillales.D_4__Bacillaceae.D_5__Geobacillus	2.94384			-
D_0__Bacteria.D_1__Firmicutes.D_2__Bacilli.D_3__Bacillales.D_4__Bacillaceae.D_5__Paucisalibacillus	1.68052			-
D_0__Bacteria.D_1__Firmicutes.D_2__Bacilli.D_3__Bacillales.D_4__Bacillaceae.Other	2.99553			-
D_0__Bacteria.D_1__Firmicutes.D_2__Bacilli.D_3__Bacillales.D_4__FamilyX	2.19824			-
D_0__Bacteria.D_1__Firmicutes.D_2__Bacilli.D_3__Bacillales.D_4__FamilyX.D_5__Thermicanus	2.19824			-
D_0__Bacteria.D_1__Firmicutes.D_2__Bacilli.D_3__Bacillales.D_4__FamilyXI	2.89526			-
D_0__Bacteria.D_1__Firmicutes.D_2__Bacilli.D_3__Bacillales.D_4__FamilyXI.D_5__Gemella	2.89526			-
D_0__Bacteria.D_1__Firmicutes.D_2__Bacilli.D_3__Bacillales.D_4__FamilyXII	1.57378	Gut.Control	3.09689	0.00159254
D_0__Bacteria.D_1__Firmicutes.D_2__Bacilli.D_3__Bacillales.D_4__FamilyXII.D_5__Exiguobacterium	1.57378	Gut.Control	3.0956	0.00159254
D_0__Bacteria.D_1__Firmicutes.D_2__Bacilli.D_3__Bacillales.D_4__Paenibacillaceae	2.3649			-
D_0__Bacteria.D_1__Firmicutes.D_2__Bacilli.D_3__Bacillales.D_4__Paenibacillaceae.D_5__Paenibacillus	2.3649			-
D_0__Bacteria.D_1__Firmicutes.D_2__Bacilli.D_3__Bacillales.D_4__Planococcaceae	1.75488			-
D_0__Bacteria.D_1__Firmicutes.D_2__Bacilli.D_3__Bacillales.D_4__Planococcaceae.D_5__Sporosarcina	1.75488			-
D_0__Bacteria.D_1__Firmicutes.D_2__Bacilli.D_3__Bacillales.D_4__Sporolactobacillaceae	2.1161			-
D_0__Bacteria.D_1__Firmicutes.D_2__Bacilli.D_3__Bacillales.D_4__Sporolactobacillaceae.D_5__Sporolactobacillus	2.1161			-
D_0__Bacteria.D_1__Firmicutes.D_2__Bacilli.D_3__Bacillales.D_4__Staphylococcaceae	2.44735			-
D_0__Bacteria.D_1__Firmicutes.D_2__Bacilli.D_3__Bacillales.D_4__Staphylococcaceae.D_5__Staphylococcus	2.44735			-
D_0__Bacteria.D_1__Firmicutes.D_2__Bacilli.D_3__Lactobacillales	3.16699			-
D_0__Bacteria.D_1__Firmicutes.D_2__Bacilli.D_3__Lactobacillales.D_4__Aerococcaceae	1.62739			-
D_0__Bacteria.D_1__Firmicutes.D_2__Bacilli.D_3__Lactobacillales.D_4__Aerococcaceae.D_5__Eremococcus	1.62739			-
D_0__Bacteria.D_1__Firmicutes.D_2__Bacilli.D_3__Lactobacillales.D_4__Carnobacteriaceae	1.5578			-
D_0__Bacteria.D_1__Firmicutes.D_2__Bacilli.D_3__Lactobacillales.D_4__Carnobacteriaceae.D_5__Granulicatella	1.5578			-
D_0__Bacteria.D_1__Firmicutes.D_2__Bacilli.D_3__Lactobacillales.D_4__Enterococcaceae	2.32806			-
D_0__Bacteria.D_1__Firmicutes.D_2__Bacilli.D_3__Lactobacillales.D_4__Enterococcaceae.D_5__Enterococcus	2.32806			-
D_0__Bacteria.D_1__Firmicutes.D_2__Bacilli.D_3__Lactobacillales.D_4__Lactobacillaceae	2.43375			-
D_0__Bacteria.D_1__Firmicutes.D_2__Bacilli.D_3__Lactobacillales.D_4__Lactobacillaceae.D_5__Lactobacillus	2.43375			-
D_0__Bacteria.D_1__Firmicutes.D_2__Bacilli.D_3__Lactobacillales.D_4__Leuconostocaceae	2.60063			-
D_0__Bacteria.D_1__Firmicutes.D_2__Bacilli.D_3__Lactobacillales.D_4__Leuconostocaceae.D_5__Leuconostoc	2.60063			-
D_0__Bacteria.D_1__Firmicutes.D_2__Bacilli.D_3__Lactobacillales.D_4__Streptococcaceae	3.15426			-
D_0__Bacteria.D_1__Firmicutes.D_2__Bacilli.D_3__Lactobacillales.D_4__Streptococcaceae.D_5__Lactococcus	1.95718			-
D_0__Bacteria.D_1__Firmicutes.D_2__Bacilli.D_3__Lactobacillales.D_4__Streptococcaceae.D_5__Streptococcus	3.15426			-
D_0__Bacteria.D_1__Firmicutes.D_2__Clostridia	3.27363			-
D_0__Bacteria.D_1__Firmicutes.D_2__Clostridia.D_3__Clostridiales	3.27363			-
D_0__Bacteria.D_1__Firmicutes.D_2__Clostridia.D_3__Clostridiales.D_4__Clostridiaceae1	2.5532			-
D_0__Bacteria.D_1__Firmicutes.D_2__Clostridia.D_3__Clostridiales.D_4__Clostridiaceae1.D_5__Clostridiumsensustricto10	2.54162			-
D_0__Bacteria.D_1__Firmicutes.D_2__Clostridia.D_3__Clostridiales.D_4__Clostridiaceae1.D_5__Fonticella	0.973416			-
D_0__Bacteria.D_1__Firmicutes.D_2__Clostridia.D_3__Clostridiales.D_4__FamilyXI	3.08808			-
D_0__Bacteria.D_1__Firmicutes.D_2__Clostridia.D_3__Clostridiales.D_4__FamilyXI.D_5__Anaerococcus	2.59611			-
D_0__Bacteria.D_1__Firmicutes.D_2__Clostridia.D_3__Clostridiales.D_4__FamilyXI.D_5__Peptoniphilus	2.91923			-
D_0__Bacteria.D_1__Firmicutes.D_2__Clostridia.D_3__Clostridiales.D_4__Lachnospiraceae	2.80861			-
D_0__Bacteria.D_1__Firmicutes.D_2__Clostridia.D_3__Clostridiales.D_4__Lachnospiraceae.D_5__Blautia	1.5273			-
D_0__Bacteria.D_1__Firmicutes.D_2__Clostridia.D_3__Clostridiales.D_4__Lachnospiraceae.D_5__Coprococcus	2.42452			-
D_0__Bacteria.D_1__Firmicutes.D_2__Clostridia.D_3__Clostridiales.D_4__Lachnospiraceae.D_5__Dorea	2.57727			-
D_0__Bacteria.D_1__Firmicutes.D_2__Clostridia.D_3__Clostridiales.D_4__Peptostreptococcaceae	0.966868			-
D_0__Bacteria.D_1__Firmicutes.D_2__Clostridia.D_3__Clostridiales.D_4__Peptostreptococcaceae.D_5__IncertaeSedis	0.966868			-
D_0__Bacteria.D_1__Firmicutes.D_2__Clostridia.D_3__Thermoanaerobacterales	1.97342			-
D_0__Bacteria.D_1__Firmicutes.D_2__Clostridia.D_3__Thermoanaerobacterales.D_4__FamilyIII	1.97342			-
D_0__Bacteria.D_1__Firmicutes.D_2__Clostridia.D_3__Thermoanaerobacterales.D_4__FamilyIII.D_5__Thermoanaerobacterium	1.97342			-
D_0__Bacteria.D_1__Firmicutes.D_2__Negativicutes	0.672386			-
D_0__Bacteria.D_1__Firmicutes.D_2__Negativicutes.D_3__Selenomonadales	0.672386			-
D_0__Bacteria.D_1__Firmicutes.D_2__Negativicutes.D_3__Selenomonadales.D_4__Veillonellaceae	0.672386			-
D_0__Bacteria.D_1__Firmicutes.D_2__Negativicutes.D_3__Selenomonadales.D_4__Veillonellaceae.D_5__Sporomusa	0.672386			-
D_0__Bacteria.D_1__Fusobacteria	2.71653			-
D_0__Bacteria.D_1__Fusobacteria.D_2__Fusobacteriia	2.71653			-
D_0__Bacteria.D_1__Fusobacteria.D_2__Fusobacteriia.D_3__Fusobacteriales	2.71653			-
D_0__Bacteria.D_1__Fusobacteria.D_2__Fusobacteriia.D_3__Fusobacteriales.D_4__Fusobacteriaceae	2.71653			-
D_0__Bacteria.D_1__Fusobacteria.D_2__Fusobacteriia.D_3__Fusobacteriales.D_4__Fusobacteriaceae.D_5__Cetobacterium	2.71653			-
D_0__Bacteria.D_1__Fusobacteria.D_2__Fusobacteriia.D_3__Fusobacteriales.D_4__Leptotrichiaceae	1.52276			-
D_0__Bacteria.D_1__Fusobacteria.D_2__Fusobacteriia.D_3__Fusobacteriales.D_4__Leptotrichiaceae.D_5__Leptotrichia	1.52276			-
D_0__Bacteria.D_1__Nitrospirae	0.867753			-
D_0__Bacteria.D_1__Nitrospirae.D_2__Nitrospira	0.867753			-
D_0__Bacteria.D_1__Nitrospirae.D_2__Nitrospira.D_3__Nitrospirales	0.867753			-
D_0__Bacteria.D_1__Nitrospirae.D_2__Nitrospira.D_3__Nitrospirales.D_4__Nitrospiraceae	0.867753			-
D_0__Bacteria.D_1__Nitrospirae.D_2__Nitrospira.D_3__Nitrospirales.D_4__Nitrospiraceae.D_5__Nitrospira	0.867753			-
D_0__Bacteria.D_1__Planctomycetes	2.48581			-
D_0__Bacteria.D_1__Planctomycetes.D_2__Phycisphaerae	0.642769			-
D_0__Bacteria.D_1__Planctomycetes.D_2__Phycisphaerae.D_3__Phycisphaerales	0.642769			-
D_0__Bacteria.D_1__Planctomycetes.D_2__Phycisphaerae.D_3__Phycisphaerales.D_4__Phycisphaeraceae	0.642769			-
D_0__Bacteria.D_1__Planctomycetes.D_2__Phycisphaerae.D_3__Phycisphaerales.D_4__Phycisphaeraceae.D_5__CL500_3	0.0595547			-
D_0__Bacteria.D_1__Planctomycetes.D_2__Phycisphaerae.D_3__Phycisphaerales.D_4__Phycisphaeraceae.D_5__SM1A02	0.642769			-
D_0__Bacteria.D_1__Planctomycetes.D_2__Planctomycetacia	2.47954			-
D_0__Bacteria.D_1__Planctomycetes.D_2__Planctomycetacia.D_3__Planctomycetales	2.47954			-
D_0__Bacteria.D_1__Planctomycetes.D_2__Planctomycetacia.D_3__Planctomycetales.D_4__Planctomycetaceae	2.47954			-
D_0__Bacteria.D_1__Planctomycetes.D_2__Planctomycetacia.D_3__Planctomycetales.D_4__Planctomycetaceae.D_5__Gemmata	2.42166	Gut.Control	2.86451	0.0243382
D_0__Bacteria.D_1__Planctomycetes.D_2__Planctomycetacia.D_3__Planctomycetales.D_4__Planctomycetaceae.D_5__Pirellula	1.35315			-
D_0__Bacteria.D_1__Planctomycetes.D_2__Planctomycetacia.D_3__Planctomycetales.D_4__Planctomycetaceae.D_5__Planctomyces	0.826654			-
D_0__Bacteria.D_1__Planctomycetes.D_2__Planctomycetacia.D_3__Planctomycetales.D_4__Planctomycetaceae.D_5__uncultured	0.973697			-
D_0__Bacteria.D_1__Proteobacteria	5.98343			-
D_0__Bacteria.D_1__Proteobacteria.D_2__Alphaproteobacteria	3.90845			-
D_0__Bacteria.D_1__Proteobacteria.D_2__Alphaproteobacteria.D_3__Caulobacterales	2.94208			-
D_0__Bacteria.D_1__Proteobacteria.D_2__Alphaproteobacteria.D_3__Caulobacterales.D_4__Caulobacteraceae	2.94208			-
D_0__Bacteria.D_1__Proteobacteria.D_2__Alphaproteobacteria.D_3__Caulobacterales.D_4__Caulobacteraceae.D_5__uncultured	2.94208			-
D_0__Bacteria.D_1__Proteobacteria.D_2__Alphaproteobacteria.D_3__Rhizobiales	3.54322			-
D_0__Bacteria.D_1__Proteobacteria.D_2__Alphaproteobacteria.D_3__Rhizobiales.D_4__1174_901_12	1.94641			-
D_0__Bacteria.D_1__Proteobacteria.D_2__Alphaproteobacteria.D_3__Rhizobiales.D_4__1174_901_12.D_5__unculturedbacterium	1.94641			-
D_0__Bacteria.D_1__Proteobacteria.D_2__Alphaproteobacteria.D_3__Rhizobiales.D_4__alphaIcluster	1.35761			-
D_0__Bacteria.D_1__Proteobacteria.D_2__Alphaproteobacteria.D_3__Rhizobiales.D_4__alphaIcluster.D_5__unculturedbacterium	1.35761			-
D_0__Bacteria.D_1__Proteobacteria.D_2__Alphaproteobacteria.D_3__Rhizobiales.D_4__Bradyrhizobiaceae	2.8378			-
D_0__Bacteria.D_1__Proteobacteria.D_2__Alphaproteobacteria.D_3__Rhizobiales.D_4__Bradyrhizobiaceae.D_5__Bosea	2.28035			-
D_0__Bacteria.D_1__Proteobacteria.D_2__Alphaproteobacteria.D_3__Rhizobiales.D_4__Bradyrhizobiaceae.D_5__Bradyrhizobium	2.59277			-
D_0__Bacteria.D_1__Proteobacteria.D_2__Alphaproteobacteria.D_3__Rhizobiales.D_4__Bradyrhizobiaceae.Other	2.0257			-
D_0__Bacteria.D_1__Proteobacteria.D_2__Alphaproteobacteria.D_3__Rhizobiales.D_4__Brucellaceae	2.44135			-
D_0__Bacteria.D_1__Proteobacteria.D_2__Alphaproteobacteria.D_3__Rhizobiales.D_4__Brucellaceae.D_5__Ochrobactrum	2.44135			-
D_0__Bacteria.D_1__Proteobacteria.D_2__Alphaproteobacteria.D_3__Rhizobiales.D_4__Methylobacteriaceae	3.41805			-
D_0__Bacteria.D_1__Proteobacteria.D_2__Alphaproteobacteria.D_3__Rhizobiales.D_4__Methylobacteriaceae.D_5__Meganema	0.617347			-
D_0__Bacteria.D_1__Proteobacteria.D_2__Alphaproteobacteria.D_3__Rhizobiales.D_4__Methylobacteriaceae.D_5__Methylobacterium	3.41805			-
D_0__Bacteria.D_1__Proteobacteria.D_2__Alphaproteobacteria.D_3__Rhizobiales.D_4__Rhizobiaceae	2.90979			-
D_0__Bacteria.D_1__Proteobacteria.D_2__Alphaproteobacteria.D_3__Rhizobiales.D_4__Rhizobiaceae.D_5__Rhizobium	2.86327			-
D_0__Bacteria.D_1__Proteobacteria.D_2__Alphaproteobacteria.D_3__Rhizobiales.D_4__Rhizobiaceae.Other	1.99753			-
D_0__Bacteria.D_1__Proteobacteria.D_2__Alphaproteobacteria.D_3__Rhizobiales.Other	2.43164			-
D_0__Bacteria.D_1__Proteobacteria.D_2__Alphaproteobacteria.D_3__Rhizobiales.Other.Other	2.43164			-
D_0__Bacteria.D_1__Proteobacteria.D_2__Alphaproteobacteria.D_3__Rhodobacterales	2.02241			-
D_0__Bacteria.D_1__Proteobacteria.D_2__Alphaproteobacteria.D_3__Rhodobacterales.D_4__Rhodobacteraceae	2.02241			-
D_0__Bacteria.D_1__Proteobacteria.D_2__Alphaproteobacteria.D_3__Rhodobacterales.D_4__Rhodobacteraceae.D_5__Paracoccus	0.822607			-
D_0__Bacteria.D_1__Proteobacteria.D_2__Alphaproteobacteria.D_3__Rhodobacterales.D_4__Rhodobacteraceae.D_5__Rhodobacter	1.96433			-
D_0__Bacteria.D_1__Proteobacteria.D_2__Alphaproteobacteria.D_3__Rhodobacterales.D_4__Rhodobacteraceae.Other	1.11989			-
D_0__Bacteria.D_1__Proteobacteria.D_2__Alphaproteobacteria.D_3__Rhodospirillales	2.62575			-
D_0__Bacteria.D_1__Proteobacteria.D_2__Alphaproteobacteria.D_3__Rhodospirillales.D_4__Acetobacteraceae	0.441256			-
D_0__Bacteria.D_1__Proteobacteria.D_2__Alphaproteobacteria.D_3__Rhodospirillales.D_4__Acetobacteraceae.D_5__Zavarzinia	0.441256			-
D_0__Bacteria.D_1__Proteobacteria.D_2__Alphaproteobacteria.D_3__Rhodospirillales.D_4__Rhodospirillaceae	2.57318			-
D_0__Bacteria.D_1__Proteobacteria.D_2__Alphaproteobacteria.D_3__Rhodospirillales.D_4__Rhodospirillaceae.D_5__Dongia	0.867753			-
D_0__Bacteria.D_1__Proteobacteria.D_2__Alphaproteobacteria.D_3__Rhodospirillales.D_4__Rhodospirillaceae.D_5__uncultured	0.802025			-
D_0__Bacteria.D_1__Proteobacteria.D_2__Alphaproteobacteria.D_3__Rhodospirillales.D_4__Rhodospirillaceae.Other	2.56454			-
D_0__Bacteria.D_1__Proteobacteria.D_2__Alphaproteobacteria.D_3__Rhodospirillales.D_4__RhodospirillalesIncertaeSedis	1.93997			-
D_0__Bacteria.D_1__Proteobacteria.D_2__Alphaproteobacteria.D_3__Rhodospirillales.D_4__RhodospirillalesIncertaeSedis.D_5__Reyranella	1.93997			-
D_0__Bacteria.D_1__Proteobacteria.D_2__Alphaproteobacteria.D_3__Rickettsiales	3.13475			-
D_0__Bacteria.D_1__Proteobacteria.D_2__Alphaproteobacteria.D_3__Rickettsiales.D_4__mitochondria	2.08405			-
D_0__Bacteria.D_1__Proteobacteria.D_2__Alphaproteobacteria.D_3__Rickettsiales.D_4__mitochondria.D_5__Talaromycespurpurogenus	2.08405			-
D_0__Bacteria.D_1__Proteobacteria.D_2__Alphaproteobacteria.D_3__Rickettsiales.D_4__mitochondria.D_5__Vermamoebavermiformis	0.566723			-
D_0__Bacteria.D_1__Proteobacteria.D_2__Alphaproteobacteria.D_3__Rickettsiales.D_4__mitochondria.Other	0.726381			-
D_0__Bacteria.D_1__Proteobacteria.D_2__Alphaproteobacteria.D_3__Rickettsiales.D_4__Rickettsiaceae	3.13187			-
D_0__Bacteria.D_1__Proteobacteria.D_2__Alphaproteobacteria.D_3__Rickettsiales.D_4__Rickettsiaceae.D_5__Rickettsia	3.13187			-
D_0__Bacteria.D_1__Proteobacteria.D_2__Alphaproteobacteria.D_3__Sphingomonadales	3.33096			-
D_0__Bacteria.D_1__Proteobacteria.D_2__Alphaproteobacteria.D_3__Sphingomonadales.D_4__Erythrobacteraceae	1.05306			-
D_0__Bacteria.D_1__Proteobacteria.D_2__Alphaproteobacteria.D_3__Sphingomonadales.D_4__Erythrobacteraceae.D_5__Erythrobacter	1.05306			-
D_0__Bacteria.D_1__Proteobacteria.D_2__Alphaproteobacteria.D_3__Sphingomonadales.D_4__Sphingomonadaceae	3.33096			-
D_0__Bacteria.D_1__Proteobacteria.D_2__Alphaproteobacteria.D_3__Sphingomonadales.D_4__Sphingomonadaceae.D_5__Sphingobium	2.47877			-
D_0__Bacteria.D_1__Proteobacteria.D_2__Alphaproteobacteria.D_3__Sphingomonadales.D_4__Sphingomonadaceae.D_5__Sphingomonas	3.26518			-
D_0__Bacteria.D_1__Proteobacteria.D_2__Alphaproteobacteria.D_3__Sphingomonadales.D_4__Sphingomonadaceae.D_5__Zymomonas	1.20179			-
D_0__Bacteria.D_1__Proteobacteria.D_2__Betaproteobacteria	5.15142			-
D_0__Bacteria.D_1__Proteobacteria.D_2__Betaproteobacteria.D_3__Burkholderiales	5.11378			-
D_0__Bacteria.D_1__Proteobacteria.D_2__Betaproteobacteria.D_3__Burkholderiales.D_4__Alcaligenaceae	3.06383			-
D_0__Bacteria.D_1__Proteobacteria.D_2__Betaproteobacteria.D_3__Burkholderiales.D_4__Alcaligenaceae.D_5__Achromobacter	3.06383			-
D_0__Bacteria.D_1__Proteobacteria.D_2__Betaproteobacteria.D_3__Burkholderiales.D_4__Alcaligenaceae.D_5__uncultured	0.90796			-
D_0__Bacteria.D_1__Proteobacteria.D_2__Betaproteobacteria.D_3__Burkholderiales.D_4__Burkholderiaceae	3.11372			-
D_0__Bacteria.D_1__Proteobacteria.D_2__Betaproteobacteria.D_3__Burkholderiales.D_4__Burkholderiaceae.D_5__Burkholderia	1.88689			-
D_0__Bacteria.D_1__Proteobacteria.D_2__Betaproteobacteria.D_3__Burkholderiales.D_4__Burkholderiaceae.D_5__Cupriavidus	1.91542			-
D_0__Bacteria.D_1__Proteobacteria.D_2__Betaproteobacteria.D_3__Burkholderiales.D_4__Burkholderiaceae.D_5__Ralstonia	3.09364			-
D_0__Bacteria.D_1__Proteobacteria.D_2__Betaproteobacteria.D_3__Burkholderiales.D_4__Comamonadaceae	5.0989			-
D_0__Bacteria.D_1__Proteobacteria.D_2__Betaproteobacteria.D_3__Burkholderiales.D_4__Comamonadaceae.D_5__Comamonas	5.00402			-
D_0__Bacteria.D_1__Proteobacteria.D_2__Betaproteobacteria.D_3__Burkholderiales.D_4__Comamonadaceae.D_5__Delftia	3.4104			-
D_0__Bacteria.D_1__Proteobacteria.D_2__Betaproteobacteria.D_3__Burkholderiales.D_4__Comamonadaceae.D_5__Pelomonas	3.21272			-
D_0__Bacteria.D_1__Proteobacteria.D_2__Betaproteobacteria.D_3__Burkholderiales.D_4__Comamonadaceae.D_5__Tepidimonas	2.20355			-
D_0__Bacteria.D_1__Proteobacteria.D_2__Betaproteobacteria.D_3__Burkholderiales.D_4__Comamonadaceae.Other	4.36817			-
D_0__Bacteria.D_1__Proteobacteria.D_2__Betaproteobacteria.D_3__Burkholderiales.D_4__Oxalobacteraceae	3.64563			-
D_0__Bacteria.D_1__Proteobacteria.D_2__Betaproteobacteria.D_3__Burkholderiales.D_4__Oxalobacteraceae.D_5__Massilia	3.6136			-
D_0__Bacteria.D_1__Proteobacteria.D_2__Betaproteobacteria.D_3__Burkholderiales.D_4__Oxalobacteraceae.D_5__Noviherbaspirillum	1.59894			-
D_0__Bacteria.D_1__Proteobacteria.D_2__Betaproteobacteria.D_3__Burkholderiales.D_4__Oxalobacteraceae.D_5__uncultured	1.86775			-
D_0__Bacteria.D_1__Proteobacteria.D_2__Betaproteobacteria.D_3__Burkholderiales.D_4__Oxalobacteraceae.D_5__Undibacterium	2.49751			-
D_0__Bacteria.D_1__Proteobacteria.D_2__Betaproteobacteria.D_3__Burkholderiales.D_4__Oxalobacteraceae.Other	2.50972			-
D_0__Bacteria.D_1__Proteobacteria.D_2__Betaproteobacteria.D_3__Hydrogenophilales	1.66509			-
D_0__Bacteria.D_1__Proteobacteria.D_2__Betaproteobacteria.D_3__Hydrogenophilales.D_4__Hydrogenophilaceae	1.66509			-
D_0__Bacteria.D_1__Proteobacteria.D_2__Betaproteobacteria.D_3__Hydrogenophilales.D_4__Hydrogenophilaceae.D_5__Hydrogenophilus	1.66509			-
D_0__Bacteria.D_1__Proteobacteria.D_2__Betaproteobacteria.D_3__Neisseriales	3.66917			-
D_0__Bacteria.D_1__Proteobacteria.D_2__Betaproteobacteria.D_3__Neisseriales.D_4__Neisseriaceae	3.66917			-
D_0__Bacteria.D_1__Proteobacteria.D_2__Betaproteobacteria.D_3__Neisseriales.D_4__Neisseriaceae.D_5__Leeia	3.23157			-
D_0__Bacteria.D_1__Proteobacteria.D_2__Betaproteobacteria.D_3__Neisseriales.D_4__Neisseriaceae.D_5__uncultured	2.11181			-
D_0__Bacteria.D_1__Proteobacteria.D_2__Betaproteobacteria.D_3__Neisseriales.D_4__Neisseriaceae.D_5__Vogesella	3.53054			-
D_0__Bacteria.D_1__Proteobacteria.D_2__Betaproteobacteria.D_3__Rhodocyclales	3.70677			-
D_0__Bacteria.D_1__Proteobacteria.D_2__Betaproteobacteria.D_3__Rhodocyclales.D_4__Rhodocyclaceae	3.70677			-
D_0__Bacteria.D_1__Proteobacteria.D_2__Betaproteobacteria.D_3__Rhodocyclales.D_4__Rhodocyclaceae.D_5__Methyloversatilis	3.35367			-
D_0__Bacteria.D_1__Proteobacteria.D_2__Betaproteobacteria.D_3__Rhodocyclales.D_4__Rhodocyclaceae.D_5__Zoogloea	3.45224			-
D_0__Bacteria.D_1__Proteobacteria.D_2__Betaproteobacteria.Other	3.83268			-
D_0__Bacteria.D_1__Proteobacteria.D_2__Betaproteobacteria.Other.Other	3.83268			-
D_0__Bacteria.D_1__Proteobacteria.D_2__Betaproteobacteria.Other.Other.Other	3.83268			-
D_0__Bacteria.D_1__Proteobacteria.D_2__Deltaproteobacteria	2.66812			-
D_0__Bacteria.D_1__Proteobacteria.D_2__Deltaproteobacteria.D_3__Bdellovibrionales	2.08256			-
D_0__Bacteria.D_1__Proteobacteria.D_2__Deltaproteobacteria.D_3__Bdellovibrionales.D_4__Bdellovibrionaceae	2.08256			-
D_0__Bacteria.D_1__Proteobacteria.D_2__Deltaproteobacteria.D_3__Bdellovibrionales.D_4__Bdellovibrionaceae.D_5__Bdellovibrio	2.08256			-
D_0__Bacteria.D_1__Proteobacteria.D_2__Deltaproteobacteria.D_3__GR_WP33_30	0.973697			-
D_0__Bacteria.D_1__Proteobacteria.D_2__Deltaproteobacteria.D_3__GR_WP33_30.D_4__unculturedbacterium	0.81886			-
D_0__Bacteria.D_1__Proteobacteria.D_2__Deltaproteobacteria.D_3__GR_WP33_30.D_4__unculturedbacterium.D_5__	0.81886			-
D_0__Bacteria.D_1__Proteobacteria.D_2__Deltaproteobacteria.D_3__GR_WP33_30.D_4__unculturedDesulfuromonadalesbacterium	0.450666			-
D_0__Bacteria.D_1__Proteobacteria.D_2__Deltaproteobacteria.D_3__GR_WP33_30.D_4__unculturedDesulfuromonadalesbacterium.D_5__	0.450666			-
D_0__Bacteria.D_1__Proteobacteria.D_2__Deltaproteobacteria.D_3__GR_WP33_30.D_4__unculturedsoilbacterium	0.235646			-
D_0__Bacteria.D_1__Proteobacteria.D_2__Deltaproteobacteria.D_3__GR_WP33_30.D_4__unculturedsoilbacterium.D_5__	0.235646			-
D_0__Bacteria.D_1__Proteobacteria.D_2__Deltaproteobacteria.D_3__GR_WP33_30.Other	0.487712			-
D_0__Bacteria.D_1__Proteobacteria.D_2__Deltaproteobacteria.D_3__GR_WP33_30.Other.Other	0.487712			-
D_0__Bacteria.D_1__Proteobacteria.D_2__Deltaproteobacteria.D_3__Myxococcales	2.52552			-
D_0__Bacteria.D_1__Proteobacteria.D_2__Deltaproteobacteria.D_3__Myxococcales.D_4__0319_6G20	2.52552			-
D_0__Bacteria.D_1__Proteobacteria.D_2__Deltaproteobacteria.D_3__Myxococcales.D_4__0319_6G20.D_5__unculturedbacterium	2.52552			-
D_0__Bacteria.D_1__Proteobacteria.D_2__Deltaproteobacteria.D_3__Myxococcales.D_4__0319_6G20.Other	0.235646			-
D_0__Bacteria.D_1__Proteobacteria.D_2__Deltaproteobacteria.D_3__Myxococcales.D_4__Haliangiaceae	1.32513			-
D_0__Bacteria.D_1__Proteobacteria.D_2__Deltaproteobacteria.D_3__Myxococcales.D_4__Haliangiaceae.D_5__Haliangium	1.32513			-
D_0__Bacteria.D_1__Proteobacteria.D_2__Deltaproteobacteria.D_3__Sh765B_TzT_29	0.428784			-
D_0__Bacteria.D_1__Proteobacteria.D_2__Deltaproteobacteria.D_3__Sh765B_TzT_29.D_4__uncultureddeltaproteobacterium	0.428784			-
D_0__Bacteria.D_1__Proteobacteria.D_2__Deltaproteobacteria.D_3__Sh765B_TzT_29.D_4__uncultureddeltaproteobacterium.D_5__	0.428784			-
D_0__Bacteria.D_1__Proteobacteria.D_2__Gammaproteobacteria	5.95646			-
D_0__Bacteria.D_1__Proteobacteria.D_2__Gammaproteobacteria.D_3__Aeromonadales	5.28085			-
D_0__Bacteria.D_1__Proteobacteria.D_2__Gammaproteobacteria.D_3__Aeromonadales.D_4__Aeromonadaceae	5.28085			-
D_0__Bacteria.D_1__Proteobacteria.D_2__Gammaproteobacteria.D_3__Aeromonadales.D_4__Aeromonadaceae.D_5__Aeromonas	5.28085			-
D_0__Bacteria.D_1__Proteobacteria.D_2__Gammaproteobacteria.D_3__Alteromonadales	4.79336			-
D_0__Bacteria.D_1__Proteobacteria.D_2__Gammaproteobacteria.D_3__Alteromonadales.D_4__Shewanellaceae	4.79336			-
D_0__Bacteria.D_1__Proteobacteria.D_2__Gammaproteobacteria.D_3__Alteromonadales.D_4__Shewanellaceae.D_5__Shewanella	4.79336			-
D_0__Bacteria.D_1__Proteobacteria.D_2__Gammaproteobacteria.D_3__Enterobacteriales	4.43134			-
D_0__Bacteria.D_1__Proteobacteria.D_2__Gammaproteobacteria.D_3__Enterobacteriales.D_4__Enterobacteriaceae	4.43134			-
D_0__Bacteria.D_1__Proteobacteria.D_2__Gammaproteobacteria.D_3__Enterobacteriales.D_4__Enterobacteriaceae.D_5__Escherichia_Shigella	3.38828			-
D_0__Bacteria.D_1__Proteobacteria.D_2__Gammaproteobacteria.D_3__Enterobacteriales.D_4__Enterobacteriaceae.D_5__Plesiomonas	4.38605			-
D_0__Bacteria.D_1__Proteobacteria.D_2__Gammaproteobacteria.D_3__Enterobacteriales.D_4__Enterobacteriaceae.Other	2.35915			-
D_0__Bacteria.D_1__Proteobacteria.D_2__Gammaproteobacteria.D_3__Legionellales	2.22395			-
D_0__Bacteria.D_1__Proteobacteria.D_2__Gammaproteobacteria.D_3__Legionellales.D_4__Coxiellaceae	1.29248			-
D_0__Bacteria.D_1__Proteobacteria.D_2__Gammaproteobacteria.D_3__Legionellales.D_4__Coxiellaceae.D_5__Aquicella	0.625214			-
D_0__Bacteria.D_1__Proteobacteria.D_2__Gammaproteobacteria.D_3__Legionellales.D_4__Coxiellaceae.D_5__Coxiella	1.18727			-
D_0__Bacteria.D_1__Proteobacteria.D_2__Gammaproteobacteria.D_3__Legionellales.D_4__Legionellaceae	2.16986			-
D_0__Bacteria.D_1__Proteobacteria.D_2__Gammaproteobacteria.D_3__Legionellales.D_4__Legionellaceae.D_5__Legionella	2.16986			-
D_0__Bacteria.D_1__Proteobacteria.D_2__Gammaproteobacteria.D_3__NKB5	2.0731	Gut.Control	2.71579	0.00647987
D_0__Bacteria.D_1__Proteobacteria.D_2__Gammaproteobacteria.D_3__NKB5.D_4__unculturedbacterium	2.0731	Gut.Control	2.71542	0.00647987
D_0__Bacteria.D_1__Proteobacteria.D_2__Gammaproteobacteria.D_3__NKB5.D_4__unculturedbacterium.D_5__	2.0731	Gut.Control	2.71538	0.00647987
D_0__Bacteria.D_1__Proteobacteria.D_2__Gammaproteobacteria.D_3__Oceanospirillales	2.55961			-
D_0__Bacteria.D_1__Proteobacteria.D_2__Gammaproteobacteria.D_3__Oceanospirillales.D_4__Halomonadaceae	2.55961			-
D_0__Bacteria.D_1__Proteobacteria.D_2__Gammaproteobacteria.D_3__Oceanospirillales.D_4__Halomonadaceae.D_5__Halomonas	2.55961			-
D_0__Bacteria.D_1__Proteobacteria.D_2__Gammaproteobacteria.D_3__Oceanospirillales.D_4__Halomonadaceae.Other	1.1521			-
D_0__Bacteria.D_1__Proteobacteria.D_2__Gammaproteobacteria.D_3__Pasteurellales	2.51747			-
D_0__Bacteria.D_1__Proteobacteria.D_2__Gammaproteobacteria.D_3__Pasteurellales.D_4__Pasteurellaceae	2.51747			-
D_0__Bacteria.D_1__Proteobacteria.D_2__Gammaproteobacteria.D_3__Pasteurellales.D_4__Pasteurellaceae.D_5__Haemophilus	2.40731			-
D_0__Bacteria.D_1__Proteobacteria.D_2__Gammaproteobacteria.D_3__Pasteurellales.D_4__Pasteurellaceae.Other	1.86779			-
D_0__Bacteria.D_1__Proteobacteria.D_2__Gammaproteobacteria.D_3__Pseudomonadales	5.02603			-
D_0__Bacteria.D_1__Proteobacteria.D_2__Gammaproteobacteria.D_3__Pseudomonadales.D_4__Moraxellaceae	4.63185	Gut.HF	4.31481	0.00140605
D_0__Bacteria.D_1__Proteobacteria.D_2__Gammaproteobacteria.D_3__Pseudomonadales.D_4__Moraxellaceae.D_5__Acinetobacter	4.63129	Gut.HF	4.31433	0.00140605
D_0__Bacteria.D_1__Proteobacteria.D_2__Gammaproteobacteria.D_3__Pseudomonadales.D_4__Moraxellaceae.D_5__Perlucidibaca	1.63159			-
D_0__Bacteria.D_1__Proteobacteria.D_2__Gammaproteobacteria.D_3__Pseudomonadales.D_4__Moraxellaceae.D_5__Psychrobacter	1.08405			-
D_0__Bacteria.D_1__Proteobacteria.D_2__Gammaproteobacteria.D_3__Pseudomonadales.D_4__Pseudomonadaceae	4.80165			-
D_0__Bacteria.D_1__Proteobacteria.D_2__Gammaproteobacteria.D_3__Pseudomonadales.D_4__Pseudomonadaceae.D_5__Cellvibrio	0.51002			-
D_0__Bacteria.D_1__Proteobacteria.D_2__Gammaproteobacteria.D_3__Pseudomonadales.D_4__Pseudomonadaceae.D_5__Pseudomonas	4.80163			-
D_0__Bacteria.D_1__Proteobacteria.D_2__Gammaproteobacteria.D_3__Vibrionales	5.74774			-
D_0__Bacteria.D_1__Proteobacteria.D_2__Gammaproteobacteria.D_3__Vibrionales.D_4__Vibrionaceae	5.74774			-
D_0__Bacteria.D_1__Proteobacteria.D_2__Gammaproteobacteria.D_3__Vibrionales.D_4__Vibrionaceae.D_5__Vibrio	5.74774			-
D_0__Bacteria.D_1__Proteobacteria.D_2__Gammaproteobacteria.D_3__Xanthomonadales	4.39773			-
D_0__Bacteria.D_1__Proteobacteria.D_2__Gammaproteobacteria.D_3__Xanthomonadales.D_4__Nevskiaceae	0.20899			-
D_0__Bacteria.D_1__Proteobacteria.D_2__Gammaproteobacteria.D_3__Xanthomonadales.D_4__Nevskiaceae.D_5__Alkanibacter	0.20899			-
D_0__Bacteria.D_1__Proteobacteria.D_2__Gammaproteobacteria.D_3__Xanthomonadales.D_4__Xanthomonadaceae	4.39773			-
D_0__Bacteria.D_1__Proteobacteria.D_2__Gammaproteobacteria.D_3__Xanthomonadales.D_4__Xanthomonadaceae.D_5__Pseudoxanthomonas	1.74389			-
D_0__Bacteria.D_1__Proteobacteria.D_2__Gammaproteobacteria.D_3__Xanthomonadales.D_4__Xanthomonadaceae.D_5__Stenotrophomonas	4.3975			-
D_0__Bacteria.D_1__Proteobacteria.D_2__Gammaproteobacteria.D_3__Xanthomonadales.D_4__Xanthomonadaceae.D_5__Tahibacter	1.13099			-
D_0__Bacteria.D_1__SHA_109	0.751696			-
D_0__Bacteria.D_1__SHA_109.D_2__unculturedbacterium	0.751696			-
D_0__Bacteria.D_1__SHA_109.D_2__unculturedbacterium.D_3__	0.751696			-
D_0__Bacteria.D_1__SHA_109.D_2__unculturedbacterium.D_3__.D_4__	0.751696			-
D_0__Bacteria.D_1__SHA_109.D_2__unculturedbacterium.D_3__.D_4__.D_5__	0.751696			-
D_0__Bacteria.D_1__Verrucomicrobia	1.27286			-
D_0__Bacteria.D_1__Verrucomicrobia.D_2__Opitutae	0.867753			-
D_0__Bacteria.D_1__Verrucomicrobia.D_2__Opitutae.D_3__vadinHA64	0.867753			-
D_0__Bacteria.D_1__Verrucomicrobia.D_2__Opitutae.D_3__vadinHA64.D_4__unculturedbacterium	0.867753			-
D_0__Bacteria.D_1__Verrucomicrobia.D_2__Opitutae.D_3__vadinHA64.D_4__unculturedbacterium.D_5__	0.867753			-
D_0__Bacteria.D_1__Verrucomicrobia.D_2__VerrucomicrobiaIncertaeSedis	1.05573			-
D_0__Bacteria.D_1__Verrucomicrobia.D_2__VerrucomicrobiaIncertaeSedis.D_3__UnknownOrder	1.05573			-
D_0__Bacteria.D_1__Verrucomicrobia.D_2__VerrucomicrobiaIncertaeSedis.D_3__UnknownOrder.D_4__UnknownFamily	1.05573			-
D_0__Bacteria.D_1__Verrucomicrobia.D_2__VerrucomicrobiaIncertaeSedis.D_3__UnknownOrder.D_4__UnknownFamily.D_5__CandidatusMethylacidiphilum	1.05573			-
D_0__Bacteria.Other	4.43826			-
D_0__Bacteria.Other.Other	4.43826			-
D_0__Bacteria.Other.Other.Other	4.43826			-
D_0__Bacteria.Other.Other.Other.Other	4.43826			-
D_0__Bacteria.Other.Other.Other.Other.Other	4.43826			-
D_0__Archaea	1.71784			-
D_0__Archaea.D_1__Euryarchaeota	1.71784			-
D_0__Archaea.D_1__Euryarchaeota.D_2__Halobacteria	1.71784			-
D_0__Archaea.D_1__Euryarchaeota.D_2__Halobacteria.D_3__Halobacteriales	1.71784			-
D_0__Archaea.D_1__Euryarchaeota.D_2__Halobacteria.D_3__Halobacteriales.D_4__Halobacteriaceae	1.71784			-
D_0__Archaea.D_1__Euryarchaeota.D_2__Halobacteria.D_3__Halobacteriales.D_4__Halobacteriaceae.D_5__Halarchaeum	1.71784			-
D_0__Archaea.D_1__Euryarchaeota.D_2__Methanobacteria	1.3856			-
D_0__Archaea.D_1__Euryarchaeota.D_2__Methanobacteria.D_3__Methanobacteriales	1.3856			-
D_0__Archaea.D_1__Euryarchaeota.D_2__Methanobacteria.D_3__Methanobacteriales.D_4__Methanobacteriaceae	1.3856			-
D_0__Archaea.D_1__Euryarchaeota.D_2__Methanobacteria.D_3__Methanobacteriales.D_4__Methanobacteriaceae.D_5__Methanothermobacter	1.3856			-
